1  
2  
3  
4  
5  
6  
7  
8  
9  
10  
11  
12  
13  
14  
15  
16  
17  
18  
19  
20  
21  
22

**LC3B phosphorylation regulates FYCO1 binding and  
directional transport of autophagosomes**

Jose L. Nieto-Torres<sup>1\*</sup>, Sean-Luc Shanahan<sup>1\*</sup>, Romain Chassefeyre<sup>2‡</sup>, Sara Landeras-Bueno<sup>3§</sup>,  
Sandra E. Encalada<sup>2#</sup>, and Malene Hansen<sup>1#</sup>

<sup>1</sup>Program of Development, Aging and Regeneration, Sanford Burnham Prebys Medical  
Discovery Institute, La Jolla, CA 92037, USA

<sup>2</sup>Department of Molecular Medicine, Dorris Neuroscience Center, The Scripps Research  
Institute, La Jolla, CA 92037, USA

<sup>3</sup>Department of Immunology, The Scripps Research Institute, La Jolla, CA 92037, USA

<sup>‡</sup>Current address: Evotec, Toulouse 31100, France

<sup>§</sup>Current address: La Jolla Institute for Immunology, La Jolla, CA 92037, USA

\*These authors contributed equally to this work

<sup>#</sup>Lead contacts and correspondence: [encalada@scripps.edu](mailto:encalada@scripps.edu), [mhansen@sbpdiscovery.org](mailto:mhansen@sbpdiscovery.org)

Keywords: Autophagy, LC3B, Hippo kinases, STK4, trafficking, vesicle transport, FYCO1,  
starvation

## 23 **SUMMARY**

24 Macroautophagy (hereafter referred to as autophagy) is a conserved process that promotes  
25 cellular homeostasis through the degradation of cytosolic components, also known as cargo.  
26 During autophagy, cargo is sequestered into double-membrane vesicles called  
27 autophagosomes, which are predominantly transported in the retrograde direction to the  
28 perinuclear region to fuse with lysosomes, thus ensuring cargo degradation [1]. The  
29 mechanisms regulating directional autophagosomal transport remain unclear. The ATG8 family  
30 of proteins associate with autophagosome membranes [2] and play key roles in autophagy,  
31 such as the movement of autophagosomes. This is achieved via the interaction of ATG8 with  
32 adaptor proteins, including FYCO1, a protein involved in the anterograde transport of  
33 autophagosomes toward the cell periphery [1,3–5]. We previously reported that phosphorylation  
34 of LC3B/ATG8 on threonine 50 (LC3B-T50) by the Hippo kinase STK4 is required for autophagy  
35 through unknown mechanisms [6]. Here, we show that LC3B-T50 phosphorylation decreases  
36 the interaction between LC3B and FYCO1, which in turn regulates the starvation-induced  
37 perinuclear positioning of autophagosomes. Moreover, non-phosphorylatable LC3B-T50A  
38 aberrantly switches the predominant retrograde movement of autophagosomes to anterograde  
39 movement towards the cell periphery in multiple cell types, including in mouse primary  
40 hippocampal neurons. Our data support a role of a nutrient-sensitive STK4–LC3B–FYCO1 axis  
41 in the regulation of the directional transport of autophagosomes via the post-translational  
42 regulation of LC3B. Given that autophagy is impaired in many human conditions, including  
43 neurodegenerative diseases, our findings may highlight new principles of vesicle transport  
44 regulation critical for disease etiology.

45 **RESULTS**

46

47 **LC3B-T50 Phosphorylation Regulates the Interaction Between LC3B and FYCO1**

48 We recently reported that phosphorylation of LC3B-T50 by STK4 is required for autophagy [6].  
49 Specifically, depletion of *Stk4* or expression of a non-phosphorylatable LC3B-T50A mutant  
50 causes accumulation of autophagosomes throughout the cell and clustering of lysosomes  
51 around the nucleus, leading to a block in autophagy in mouse embryonic fibroblasts (MEFs) and  
52 C2C12 mouse myoblasts [6]. We hypothesized that phosphorylation of LC3B might modulate its  
53 interaction with binding partners such as autophagy adaptor proteins. To test this, we transiently  
54 expressed HA-tagged wild-type (WT) LC3B or the phospho-mutant forms LC3B-T50A (T50A,  
55 phospho-deficient) and LC3B-T50E (T50E, phospho-mimetic) in human 293T cells, affinity  
56 purified the HA-tagged LC3B proteins, and identified the associated proteins by mass  
57 spectrometry (**Figure 1A**). Of the LC3B interactors identified in this analysis, FYCO1, a known  
58 autophagy adaptor protein [3,4], showed the most LC3B-T50 phosphorylation-sensitive binding;  
59 specifically, FYCO1 binding was ~2-fold higher to the T50A mutant and ~5-fold lower to the  
60 T50E mutant compared with binding to LC3B-WT (**Figure 1B**).

61 To validate these results, we generated an LC3B knockout (KO) of HeLa cells using  
62 CRISPR-CAS9 technology (**Figure S1A**), and expressed LC3B-WT, T50A, or T50E in these  
63 LC3B-KO cells. The autophagy-related phenotypes of the LC3B phospho-mutants in the LC3B-  
64 KO cells were similar to those reported for mouse cells [6], including an increase in  
65 autophagosomes numbers in LC3B KO cells expressing T50A that was insensitive to the  
66 autophagy inhibitor Bafilomycin A (**Figure S1B-D**). We therefore used the HeLa LC3B-KO cell  
67 line throughout the rest of the study, unless otherwise indicated. Immunoprecipitation of LC3B  
68 (**Figure 1C**) or FYCO1 (**Figure S2A**) followed by western blotting for the reciprocal protein  
69 confirmed the differential interaction of FYCO1 with LC3B-WT and T50A. Likewise, depletion of  
70 *Stk4* in MEFs caused a striking increase in FYCO1–LC3B binding (**Figure 1D**). Finally, *in vitro*

71 phosphorylation of LC3B on T50, verified with a phosphorylation-specific antibody [6], reduced  
72 LC3B interaction with FYCO1 compared with non-phosphorylated LC3B (**Figure 1E**).  
73 Collectively, these data indicate that STK4-mediated phosphorylation of LC3B decreases its  
74 interaction with FYCO1, suggesting a role for FYCO1 in STK4–LC3B-mediated autophagy  
75 regulation.

76 LC3B is known to directly interact with FYCO1 through its LC3-interacting region (LIR)  
77 [3,4]. Within the LC3B–FYCO1 binding interface, amino acid T50 of LC3B is located in close  
78 proximity to two aspartic acid residues of FYCO1 (**Figure S2B**). We therefore speculated that  
79 LC3B-T50 phosphorylation may directly affect FYCO1–LC3B binding. To test this, we performed  
80 biolayer interferometry to measure the binding affinities between LC3B-WT or phospho-mutants  
81 (bacterially expressed and purified) and a FYCO1 33 amino-acid peptide (1265–1298) spanning  
82 the LIR domain and its adjacent aspartic acids [4]. The binding affinity of LC3B-WT and the  
83 FYCO1 peptide was in the micromolar range ( $K_D \sim 4.1 \times 10^{-6}$  M) (**Figure 1F**), similar to previous  
84 reports [7]. In contrast, the binding affinity of the phospho-mimetic T50E and the FYCO1 peptide  
85 was significantly lower ( $K_D \sim 2.8 \times 10^{-5}$  M) than that of LC3B-WT (**Figure 1F**), supporting the  
86 notion that T50 phosphorylation may play a key role in blocking the direct interaction between  
87 LC3B and the FYCO1-LIR region. T50A bound to the FYCO1 peptide with an affinity ( $K_D \sim 6.0 \times$   
88  $10^{-6}$  M) in the same micromolar range as LC3B-WT (**Figure 1F**), which was expected because  
89 Hippo kinases are not expressed in bacteria [8] and LC3B-WT and T50A would thus behave in  
90 a similar manner. Collectively, these data suggest that phosphorylation of LC3B-T50 directly  
91 decreases LC3B binding affinity for FYCO1. Overall, these results indicate that phosphorylation  
92 of LC3B regulates the interaction between LC3B and FYCO1 and decreases LC3B-FYCO1  
93 binding affinity.

94

95

96 **Subcellular Localization of Autophagosomes is Regulated by LC3B-T50 Phosphorylation**  
97 **in a FYCO1-Dependent Manner**

98 As FYCO1 associates with LC3B on autophagosomes to regulate their transport [3,4], we next  
99 asked if LC3B-T50 phosphorylation status would affect FYCO1 localization to autophagosomes  
100 within cells. We counted LC3B-positive punctae as representative of autophagosomes, since  
101 lipidation-deficient versions of WT and phospho-mutant LC3Bs, which cannot associate with  
102 autophagosomes membranes [2], were diffusely localized (**Figure S2C**). These lipidation-  
103 deficient versions of WT and phospho-mutant LC3Bs maintained their differential binding to  
104 FYCO1 (**Figure S2D**), suggesting that LC3B lipidation may not be essential for LC3B  
105 phosphorylation to regulate LC3B-FYCO1 binding. Notably, the percentage of LC3B/FYCO1  
106 double-positive punctae relative to total LC3B punctae was higher in T50A, and lower in T50E,  
107 as compared to those in LC3B-WT-expressing cells (**Figure 2A-B and S2E**), indicating that  
108 LC3B-T50 phosphorylation decreases whereas de-phosphorylation increases the association of  
109 FYCO1 with autophagosomes, consistent with the LC3B-FYCO1 interaction and binding-affinity  
110 data (**Figure 1**).

111 As FYCO1 regulates anterograde transport of autophagosomes [3], we next asked  
112 whether the LC3B phosphorylation-dependent association with FYCO1 affected the subcellular  
113 positioning of autophagosomes. Immunofluorescence microscopy and imaging analysis  
114 revealed that the average distance between LC3B-positive punctae and the nucleus was  
115 significantly shorter in T50E-expressing cells (~4.0  $\mu\text{m}$ ), than in cells expressing LC3B-WT (~9.2  
116  $\mu\text{m}$ ), whereas T50A showed a longer average distance (~12.2  $\mu\text{m}$ ). Notably, the dispersal of  
117 LC3B punctae to the cell periphery in WT and T50A-expressing cells was FYCO1-dependent,  
118 as siRNA-mediated FYCO1 knockdown (**Figure S2F**) resulted in perinuclear accumulation of  
119 LC3B punctae (**Figure 2C-D and S3A**). These results show that the subcellular localization of  
120 LC3B punctae is regulated by LC3B phosphorylation in a FYCO1-dependent manner.

121 **Starvation-Induced Perinuclear Clustering of Autophagosomes is Regulated Via a STK4–**  
122 **LC3B–FYCO1 Axis**

123 Starvation is a robust inducer of autophagy and is known to enhance perinuclear positioning of  
124 autophagosomes [9]. We next investigated the effects of starvation on STK4–LC3B–FYCO1-  
125 mediated control of autophagosomal localization. Combined serum and amino-acid deprivation  
126 of HeLa cells resulted in a ~3-fold increase in the levels of phosphorylated (active) STK4 (STK4-  
127 pT183) [10] (**Figure 3A**), consistent with previous findings that the Hippo pathway is activated  
128 following serum deprivation [11]. In turn, siRNA-mediated depletion of STK4 (**Figure S3B**)  
129 prevented starvation-induced perinuclear clustering of LC3B-positive punctae in LC3B-WT–  
130 expressing cells (**Figure 3B-C and S3C**), suggesting that STK4 activation is required for the  
131 starvation-induced perinuclear positioning of autophagosomes. Consistent with these results,  
132 starvation did not change the dispersed or perinuclear subcellular localization of LC3B-positive  
133 punctae in T50A or T50E cells, respectively (**Figure 3D-E and S3D**). Collectively, these results  
134 indicate that starvation induces STK4-mediated LC3B phosphorylation-dependent positioning of  
135 autophagosomes in mammalian cells.

136 To determine whether starvation affects LC3B–FYCO1 binding, we performed co-  
137 immunoprecipitation experiments and immunofluorescence microscopy of cells expressing  
138 LC3B-WT or phospho-mutants grown under normal or starvation conditions. In LC3B-WT–  
139 expressing cells, starvation caused a 53% reduction in FYCO1 co-immunoprecipitation with  
140 LC3B (**Figure 3F**) and significantly decreased the percentage of LC3B-positive punctae co-  
141 localizing with FYCO1 (**Figure 3G and S3E**). In contrast, starvation of cells expressing T50A or  
142 T50E only slightly reduced (13-14%) the interaction between FYCO1 and either LC3B phospho-  
143 mutant (**Figure 3F**) and had no effect on the co-localization of FYCO1 with LC3B phospho-  
144 mutant–positive punctae (**Figure 3G and S3E**). Thus, starvation decreased the association  
145 between FYCO1 and LC3B in an LC3B-phosphorylation dependent manner. Overall, these data

146 indicate that nutrient deprivation regulates the STK4–LC3B–FYCO1 axis to control the  
147 subcellular positioning of autophagosomes.

148

## 149 **LC3B Phosphorylation Regulates the Directional Transport of Autophagosomes in** 150 **Mammalian Cells and Neurons**

151 Previous work indicated that FYCO1 promotes the anterograde transport of autophagosomes  
152 via its interactions with LC3B and the motor protein kinesin [3,12]. Since we showed above that  
153 LC3B-T50 phosphorylation regulated both the binding of LC3B to FYCO1 as well as  
154 autophagosome positioning, we next asked whether LC3B-T50 phosphorylation plays a role in  
155 autophagosomal transport. To investigate this, we used super-resolution (SR) live-cell imaging  
156 to characterize the intracellular transport of LC3B-positive vesicles in HeLa LC3B KO cells  
157 expressing GFP-tagged LC3B proteins (**Figure 4A**). Consistent with previous reports [13,14],  
158 GFP-LC3B WT vesicles moved primarily in the retrograde direction towards the perinuclear  
159 region, as was the case for GFP-T50E particles (**Figure 4B and Video S1 and S3**). Notably,  
160 T50E vesicles also displayed significant switches in directionality not exhibited by either GFP-  
161 LC3B WT or GFP-T50A vesicles, suggesting impaired coordination between anterograde and  
162 retrograde motors associated to those vesicles (**Figure S4A and Video S3**). In contrast, GFP-  
163 T50A vesicles were mainly transported in an anterograde direction towards the cell periphery,  
164 suggesting that phosphorylation of LC3B is important for perinuclear positioning (**Figure 4B**  
165 **and Video S2**). Overall, these results indicate that LC3B phosphorylation regulates coordination  
166 of directional transport of autophagosomes in HeLa cells and is required for retrograde transport.

167 To test whether the requirement for LC3B phosphorylation to drive the retrograde  
168 transport of LC3B-positive vesicles is conserved, we characterized the dynamics of GFP-LC3B  
169 vesicles in dissociated cultured mouse hippocampal neurons. Axonal transport is accomplished  
170 by the binding and translocation along uniformly polarized microtubules, of kinesin and dynein

171 that move cargoes in anterograde (toward the synapse) and retrograde (toward the soma)  
172 directions, respectively [15,16]. Previous studies showed that autophagosomes form in distal  
173 regions of axons, and are transported retrogradely toward the soma, where they fuse with  
174 lysosomes to drive degradation of various cargoes [17–19]. To test whether LC3B  
175 phosphorylation also affected the transport of autophagosomes in primary neurons, we  
176 characterized the dynamics of these vesicles in mammalian axons using live pseudo-total  
177 internal reflection microscopy (pTIRFM). Consistent with previous reports [17,18], GFP-LC3B  
178 WT vesicles moved primarily in the retrograde direction, spending ~60% of time moving toward  
179 the soma (**Figure 4C-D and Video S4**). In contrast, GFP-T50A vesicles spent significantly less  
180 time (~40%) moving in the retrograde direction, and instead spent longer periods moving  
181 anterogradely toward the synapse (**Figure 4C-D and Video S5**). Enhanced GFP-T50A vesicle  
182 anterograde movement was also observed following quantitative analysis of run lengths (**Figure**  
183 **4E**), which indicated that the majority (>80%) of GFP-T50A vesicles moved for longer distances  
184 in the anterograde direction, and for shorter distances and slower in the retrograde direction,  
185 compared to GFP-WT particles (**Figure 4E and S4B**). In contrast, GFP-T50E vesicles moved  
186 primarily in a retrograde fashion (**Figure 4C-D and Video S6**), similarly to GFP-LC3B WT  
187 vesicles, but with modified dynamics, including moving shorter distances (**Figure 4E**),  
188 suggesting that modulation of the state of LC3B phosphorylation can alter the processive  
189 movement of these vesicles. The reduced processivity of GFP-T50E vesicles could be either the  
190 result or a readout of the higher frequency of directionality reversals (switches) that these  
191 vesicles undertake as they moved along axons (**Figure S4C and Video S6**), similar to the  
192 increased numbers of switches observed for GFP-T50E vesicles in HeLa LC3B-KO cells  
193 (**Figure S4A and Video S3**). Overall, these results indicate that LC3B phosphorylation  
194 regulates directional transport of autophagosomes in a conserved manner in axons.



195 Previous work showed that FYCO1 drives the anterograde movement of LC3B-positive  
196 vesicles [3]. Thus, to characterize the mechanistic bases of LC3B-T50 phosphorylation-  
197 dependent regulation of autophagosomal transport, we next tested whether anterograde  
198 movement of autophagosomes in axons was dependent of FYCO1. Down-regulation of *Fyco1*  
199 using shRNAs rescued the increased time that GFP-T50A vesicles spent moving in the  
200 anterograde direction (**Figure 4F**). Thus, the LC3B phosphorylation-dependent changes in  
201 GFP-LC3B-positive particle anterograde transport in axons require FYCO1. Altogether, our data  
202 show that robust retrograde transport of LC3B-positive autophagosomes via FYCO1 binding  
203 regulation requires LC3B-T50 phosphorylation, and the absence of this post-translational  
204 modification leads to a reversal to- and enhancement of anterograde transport in HeLa cells and  
205 in mammalian neurons.

206

207 **DISCUSSION**

208  
209 In this study, we demonstrated that STK4-mediated phosphorylation of the autophagy protein  
210 LC3B is critical for regulating its interaction with the adaptor protein FYCO1 and for the control  
211 of directional autophagosomal transport in mammalian cells. We also showed that nutrient  
212 deprivation activates the STK4–LC3B–FYCO1 regulatory axis. These findings expand our  
213 fundamental understanding of the molecular regulation of autophagy with possible implications  
214 for the numerous biological processes that autophagy has been linked to [20].

215 We found that STK4-mediated phosphorylation of LC3B at T50 reduced binding of  
216 FYCO1 to LC3B, consistent with a recent report [21], as well as FYCO1 localization to  
217 autophagosomes. Compatible with the role of FYCO1 in anterograde transport of intracellular  
218 vesicles including autophagosomes [3,4,12], we showed that lack of LC3B-T50 phosphorylation  
219 resulted in enhanced anterograde transport and aberrant positioning to the cell periphery of  
220 LC3B-positive vesicles in both HeLa LC3B KO cells and primary neurons. Given that prevention  
221 of LC3B-T50 phosphorylation also increased lysosomal clustering in HeLa LC3B KO cells  
222 (**Figure S1D**) [6], these observations could account for the autophagy block observed in LC3B  
223 phosphorylation-deficient cells [6]. Based on these results, we speculate that formation of a  
224 LC3B-FYCO1-kinesin complex may promote the anterograde and inhibit the retrograde  
225 transport of progressing autophagosomes and by extension their premature fusion with  
226 lysosomes [22] that migrate to the nuclear periphery [23]. In turn, we propose that, following  
227 autophagosome formation, STK4-mediated phosphorylation of LC3B induces FYCO1  
228 dissociation from mature autophagosomes to allow their retrograde transport and ensure  
229 lysosomal fusion and cargo degradation. While other adaptor proteins facilitate the processive  
230 retrograde transport of autophagosomes [5,24], it remains to be investigated whether LC3B  
231 phosphorylation could similarly affect the binding of retrograde transport-promoting adaptors.

232           While our studies show that phosphorylation of LC3B was critical for driving retrograde  
233 transport in LC3B T50A particles, T50E-positive vesicles revealed an unusually high frequency  
234 of directional switches in HeLa LC3B KO cells and in primary neurons. It is possible that the  
235 T50E mutation, that mimics a permanent phosphorylation state and decreases the affinity of  
236 LC3B for FYCO1, may directly impair the tight coordination between kinesin and dynein [25,26],  
237 compromising both anterograde and retrograde motility and thus resulting in frequent reversals.  
238 Alternatively, a recent report suggested that the T50E mutation may compromise LC3B  
239 lipidation [21], which may result in a reduced association of LC3B with autophagosomes,  
240 decreasing FYCO1 association and leading to a loss of anterograde-retrograde coordination.  
241 Additional experiments will be critical to explain the directional switches produced by LC3B-  
242 T50E, as well as to identify potential LC3B-T50 phosphatase(s) involved in autophagosomal  
243 trafficking and recruitment of essential transport machinery. Noting that another ATG8 member,  
244 LC3A, also interacts with FYCO1 [4], it will also be of interest to investigate if different ATG8  
245 proteins bind FYCO1 in a phosphorylation-dependent manner and participate in directional  
246 transport of autophagosomes.

247           We observed that starvation-induced perinuclear positioning of autophagosomes was  
248 dependent on STK4-mediated LC3B phosphorylation. We propose that the autophagosome  
249 repositioning process is initiated by starvation-induced activation of STK4, followed by LC3B  
250 phosphorylation, dissociation of FYCO1, and inhibition of anterograde transport and/or  
251 promotion of retrograde transport. In support of this model, anterograde transport of  
252 autophagosomes has been shown to decrease in HeLa cells during starvation [27]. In low-  
253 nutrient conditions, activation of STK4 may concomitantly reduce cell proliferation [28] and  
254 increase autophagy in an effort to re-establish homeostasis and restore nutrient availability. To  
255 this end, the nutrient-sensing complex mTORC2 has recently been identified as a direct inhibitor  
256 of STK4 activity [29] and it will be appealing to investigate its potential role as an upstream

257 regulator of the STK4–LC3B–FYCO1 axis. Indeed, it will be of interest to explore the role of this  
258 STK4–LC3B–FYCO1 regulatory axis in different biological processes, including in the decline in  
259 autophagy observed during aging and in many disease states [9,30,31], where deregulation of  
260 autophagosome transport could be a crucial factor.

261

262 **ACKNOWLEDGEMENTS**

263  
264 We thank Lee R. Lee and Sviatlana Zaretski for assistance with the affinity-purification  
265 experiments, Dr. Caroline Kumsta and Tai Chaiamarit for help with data analysis and figure  
266 preparation, members of the Hansen and Encalada labs for helpful discussions and/or critical  
267 reading of the manuscript, Drs. Tony Hunter and Jill Meisenhelder (Salk Institute) for helpful  
268 discussions, Dr. Alex Rosa Campos (Sanford Burnham Prebys Proteomics Core) for support  
269 with the mass-spectrometry analysis, Leslie Boyd (Sanford Burnham Prebys Cell Imaging Core)  
270 and Salk Institute Biophotonics Core personnel for help with image acquisition and analysis, and  
271 Dr. Erica Ollmann-Saphire (The Scripps Research Institute) for help with the binding affinity  
272 assays. J.N.T. was supported by a Fundacion Ramon Areces Postdoctoral Fellowship, and R.C.  
273 was supported by the George E. Hewitt Foundation for Medical Research. This work was  
274 funded by the following grants to S.E.E. (R01AG049483); The Glenn Foundation for Medical  
275 Research Glenn Award for Research in Biological Mechanisms of Aging; a New Scholar in  
276 Aging Award from the Lawrence Ellison Foundation; and The Baxter Family Foundation; and an  
277 NIH grant to M.H. (R01 GM117466).

278

279 **AUTHOR CONTRIBUTIONS**

280 Conceptualization, J.N.T., S.L.S., and M.H.; Methodology, J.N.T., S.L.S., R.C., S.L.B., S.E.E.,  
281 and M.H.; Validation, J.N.T., S.L.S., R.C., S.L.B., S.E.E., and M.H.; Investigation, J.N.T., S.L.S.,  
282 R.C., and S.L.B.; Writing – Original Draft, J.N.T., S.L.S., R.C., S.L.B., S.E.E., and M.H.; Writing  
283 – Review & Editing, J.N.T., S.L.S., R.C., S.L.B., S.E.E., and M.H.; Supervision, S.E.E. and M.H.;  
284 Funding Acquisition, J.N.T., S.E.E., and M.H.

285

286 **DECLARATION OF INTERESTS**

287 The authors declare no competing interests.

288 **FIGURE LEGENDS**

289 **Figure 1. LC3B phosphorylation modulates FYCO1–LC3B interactions.** (A) Schematic of  
290 pull-down assays performed in HEK 293T cells expressing WT (wild-type), T50A (phospho-  
291 deficient mutant), and T50E (phospho-mimetic mutant) LC3B proteins to identify LC3B  
292 phosphorylation-dependent interactors by mass spectrometry. (B) Quantification of FYCO1  
293 binding to LC3B proteins determined by mass spectrometry. Mean  $\pm$  SD of three technical  
294 replicates. \*\* $p < 0.0021$ , \*\*\* $p < 0.0002$ , \*\*\*\* $p < 0.0001$  by one-way ANOVA. (C) Representative  
295 western blot of FYCO1 co-immunoprecipitated with HA-tagged LC3B proteins expressed in  
296 HeLa LC3B-KO cells (n=3). (D) Representative western blot of FYCO1 co-immunoprecipitated  
297 with HA-tagged LC3B proteins in STK4-deficient and WT mouse embryonic fibroblasts (n=3). (E)  
298 Representative western blot of FYCO1 co-immunoprecipitated with non-phosphorylated or *in*  
299 *vitro*-phosphorylated GST-LC3B (n=4). GST-LC3B panel shows Coomassie staining. (C-E)  
300 Values below blots are protein ratios in relative units. (F) Biolayer interferometry assay of LC3B  
301 proteins binding to a peptide containing FYCO1-LIR and adjacent amino acids [4]. Mean  $K_D \pm$   
302 SEM of three technical replicates and  $R^2$  for binding curve fit are shown. \* $p < 0.05$  by one-way  
303 ANOVA.

304

305 **Figure 2. Subcellular localization of LC3B phospho-mutants is differentially regulated by**  
306 **FYCO1.** (A) Representative immunofluorescence micrographs of HeLa-KO cells expressing HA-  
307 LC3B-WT, T50A, or T50E co-stained for FYCO1. White arrowheads indicate co-localized LC3B  
308 and FYCO1 punctae. (B) Percentage of LC3B punctae co-localizing with FYCO1. Mean  $\pm$  SEM,  
309 \*\*\*\* $p < 0.0001$  by two-way ANOVA (n=16–27 cells from three experiments). (C) Representative  
310 immunofluorescence micrographs of LC3B-WT, T50A, or T50E punctae in control (siNS) or  
311 siFYCO1-treated HeLa cells. Dashed line defines 10  $\mu\text{m}$  from the outer nuclear edge. Scale bar  
312 = 10  $\mu\text{m}$ . White arrowheads point to LC3B-positive punctae in peripheral locations of the cell.

313 **(D)** Average distance between LC3B-positive punctae and the nucleus. Mean  $\pm$  SEM of n=20–  
314 34 cells from two experiments. \*\*\*\*p<0.0001 by two-way ANOVA.

315

316 **Figure 3. Starvation induces perinuclear localization of LC3B punctae in an LC3B**

317 **phosphorylation- and FYCO1-dependent manner. (A)** Representative western blot of total

318 and phosphorylated STK4-T183 in HeLa LC3B-KO cells incubated in normal or starvation

319 medium (n=3). Values indicate pSTK4:STK4 protein ratio normalized to  $\alpha$ -tubulin. **(B)**

320 Representative immunofluorescence micrographs of LC3B punctae in HeLa LC3B-KO cells

321 expressing control or STK4-targeting siRNA before or 1 h after incubation in starvation medium.

322 Scale bar = 10  $\mu$ m. White arrowheads point to LC3B-positive punctae in peripheral locations of

323 the cell. **(C)** Quantification of distance between LC3B punctae and the nucleus. Mean  $\pm$  SEM of

324 n=24–34 cells from three experiments. \*\*\*p<0.0002 by two-way ANOVA. **(D and E)**

325 Representative immunofluorescence micrographs **(D)** and quantification of distance from the

326 nucleus **(E)** of LC3B punctae in HeLa cells expressing the indicated LC3B proteins. Scale bar =

327 10  $\mu$ m. White arrowheads point to LC3B-positive punctae in peripheral locations of the cell.

328 Mean  $\pm$  SEM of n=18–23 cells from two experiments. \*\*\*\*p<0.0001 by two-way ANOVA. **(F)**

329 Representative western blot of FYCO1 co-immunoprecipitated with HA-tagged LC3B proteins

330 expressed in HeLa LC3B-KO cells before and 1 h after incubation in normal or starvation

331 medium. Values under blots indicate percent decrease in LC3B:FYCO1 protein ratio after

332 starvation (n=2). **(G)** Percentage of LC3B punctae co-localizing with FYCO1 in HeLa LC3B-KO

333 cells before or 1 h after incubation in starvation medium. Mean  $\pm$  SEM of n=16–27 cells from

334 two experiments. \*\*\*\*p<0.0001 by two-way ANOVA.

335

336 **Figure 4. Directional transport of LC3B punctae is regulated by the LC3B**

337 **phosphorylation. (A)** Schematic illustration of experimental setup for HeLa LC3B-KO cells.

338 Directional anterograde (Ant) or retrograde (Ret) movement of LC3B-positive vesicles is  
339 depicted. **(B)** Net anterograde or retrograde movement of LC3B-positive vesicles per cell  
340 determined by SR imaging. Mean  $\pm$  SEM of n=9–10 cells from two experiments. Percent  
341 deviation from equal directional transport was calculated by subtracting the percentage of  
342 anterograde-moving from the retrograde-moving LC3B-positive vesicles. Absolute values for net  
343 directional transport are shown. \*p<0.0332 by one-way ANOVA. **(C)** Schematic illustration of  
344 experimental setup for primary mouse hippocampal neurons. Lower images show  
345 representative first frame pictures and kymographs of the indicated GFP-positive vesicles  
346 (pseudo-black lines). **(D)** Quantification of directional transport of LC3B-positive vesicles in  
347 mouse primary neurons. Data are presented as the mean percent time spent stationary (pause),  
348 anterograde or retrograde motion for each LC3B-positive particle. Mean  $\pm$  SEM of n=26–29 cells  
349 from two experiments. \*\*\*p<0.001 by non-parametric permutation Student's t-test. **(E)**  
350 Cumulative frequency graphs of anterograde and retrograde run lengths of GFP-LC3B-positive  
351 vesicles in mouse primary neurons. n=26–29 cells from two experiments. \*p<0.05, \*\*p<0.01,  
352 \*\*\*p<0.001 by Kolmogorov–Smirnov test adjusted with Bonferroni. Similar statistically significant  
353 comparisons were obtained when analyzing the data by Rank Sum test (data not shown). **(F)**  
354 Proportion of time spent in anterograde transport of GFP-LC3B-positive vesicles in mouse  
355 primary neurons with or without *Fyco1* knockdown. Mean  $\pm$  SEM of n=19–23 cells from two  
356 experiments. \*p<0.05 by non-parametric permutation Student's t-test.

357



358 **REFERENCES**

- 359 1. Sørensen, K., Neufeld, T.P., and Simonsen, A. (2018). Membrane Trafficking in Autophagy.  
360 In *International Review of Cell and Molecular Biology*.
- 361 2. Slobodkin, M.R., and Elazar, Z. (2013). The Atg8 family: multifunctional ubiquitin-like key  
362 regulators of autophagy. *Essays Biochem* 55, 51–64.
- 363 3. Pankiv, S., Alemu, E.A., Brech, A., Bruun, J.A., Lamark, T., Overvatn, A., Bjorkoy, G.,  
364 and Johansen, T. (2010). FYCO1 is a Rab7 effector that binds to LC3 and PI3P to  
365 mediate microtubule plus end-directed vesicle transport. *J Cell Biol* 188, 253–269.
- 366 4. Olsvik, H.L., Lamark, T., Takagi, K., Larsen, K.B., Evjen, G., Øvervatn, A., Mizushima, T.,  
367 and Johansen, T. (2015). FYCO1 Contains a C-terminally Extended, LC3A/B-preferring  
368 LC3-interacting Region (LIR) Motif Required for Efficient Maturation of Autophagosomes  
369 during Basal Autophagy. *J. Biol. Chem.* 290, 29361–29374.
- 370 5. Fu, M.M., and Holzbaur, E.L. (2014). Integrated regulation of motor-driven organelle  
371 transport by scaffolding proteins. *Trends Cell Biol* 24, 564–574.
- 372 6. Wilkinson, D.S., Jariwala, J.S., Anderson, E., Mitra, K., Meisenhelder, J., Chang, J.T.,  
373 Ideker, T., Hunter, T., Nizet, V., Dillin, A., *et al.* (2015). Phosphorylation of LC3 by the  
374 Hippo Kinases STK3/STK4 Is Essential for Autophagy. *Mol Cell* 57, 55–68.
- 375 7. Cheng, X., Wang, Y., Gong, Y., Li, F., Guo, Y., Hu, S., Liu, J., and Pan, L. (2016).  
376 Structural basis of FYCO1 and MAP1LC3A interaction reveals a novel binding mode for  
377 Atg8-family proteins. *Autophagy*.
- 378 8. Halder, G., and Johnson, R.L. (2011). Hippo signaling: growth control and beyond.  
379 *Development* 138, 9–22.
- 380 9. Bejarano, E., Murray, J.W., Wang, X., Pampliega, O., Yin, D., Patel, B., Yuste, A.,  
381 Wolkoff, A.W., and Cuervo, A.M. (2018). Defective recruitment of motor proteins to  
382 autophagic compartments contributes to autophagic failure in aging. 1–18.
- 383 10. Galan, J.A., and Avruch, J. (2016). MST1/MST2 Protein Kinases: Regulation and  
384 Physiologic Roles. *Biochemistry*.
- 385 11. Plouffe, S.W., Meng, Z., Lin, K.C., Lin, B., Hong, A.W., Chun, J. V., and Guan, K.L.  
386 (2016). Characterization of Hippo Pathway Components by Gene Inactivation. *Mol. Cell*.
- 387 12. Raiborg, C., Wenzel, E.M., Pedersen, N.M., Olsvik, H., Schink, K.O., Schultz, S.W., Vietri,  
388 M., Nisi, V., Bucci, C., Brech, A., *et al.* (2015). Repeated ER-endosome contacts promote  
389 endosome translocation and neurite outgrowth. *Nature*.
- 390 13. Jahreiss, L., Menzies, F.M., and Rubinsztein, D.C. (2008). The itinerary of  
391 autophagosomes: From peripheral formation to kiss-and-run fusion with lysosomes.  
392 *Traffic*.

- 393 14. Kimura, S., Noda, T., and Yoshimori, T. (2008). Dynein-dependent movement of  
394 autophagosomes mediates efficient encounters with lysosomes. *Cell Struct Funct* 33,  
395 109–122.
- 396 15. Maday, S., Twelvetrees, A.E., Moughamian, A.J., and Holzbaur, E.L.F. (2014). Axonal  
397 Transport: Cargo-Specific Mechanisms of Motility and Regulation. *Neuron*.
- 398 16. Guedes-Dias, P., and Holzbaur, E.L.F. (2019). Axonal transport: Driving synaptic function.  
399 *Science* (80-. ).
- 400 17. Maday, S., Wallace, K.E., and Holzbaur, E.L.F. (2012). Autophagosomes initiate distally  
401 and mature during transport toward the cell soma in primary neurons. *J. Cell Biol.*
- 402 18. Maday, S., and Holzbaur, E.L.F. (2014). Autophagosome biogenesis in primary neurons  
403 follows an ordered and spatially regulated pathway. *Dev. Cell*.
- 404 19. Dong, A., Kulkarni, V.V., and Maday, S. (2019). Methods for imaging autophagosome  
405 dynamics in primary neurons. In *Methods in Molecular Biology*.
- 406 20. Levine, B., and Kroemer, G. (2019). Biological Functions of Autophagy Genes: A Disease  
407 Perspective. *Cell*.
- 408 21. Shrestha BK, Skytte Rasmussen M, Abudu YP, Bruun JA, Bowitz Larsen K, Alemu EA,  
409 Sjøttem E, Lamark T, J.T. (2019). NIMA-related kinase 9-mediated phosphorylation of the  
410 microtubule-associated LC3B protein at Thr-50 suppresses selective autophagy of  
411 p62/sequestosome 1. *J Biol Chem*.
- 412 22. Mackeh, R., Perdiz, D., Lorin, S., Codogno, P., and Pous, C. (2013). Autophagy and  
413 microtubules - new story, old players. *J. Cell Sci*.
- 414 23. Li, X., Rydzewski, N., Hider, A., Zhang, X., Yang, J., Wang, W., Gao, Q., Cheng, X., and  
415 Xu, H. (2016). A molecular mechanism to regulate lysosome motility for lysosome  
416 positioning and tubulation. *Nat. Cell Biol*.
- 417 24. Fu, M.M., Nirschl, J.J., and Holzbaur, E.L. (2014). LC3 binding to the scaffolding protein  
418 JIP1 regulates processive dynein-driven transport of autophagosomes. *Dev Cell* 29, 577–  
419 590.
- 420 25. Shubeita, G.T., Tran, S.L., Xu, J., Vershinin, M., Cermelli, S., Cotton, S.L., Welte, M.A.,  
421 and Gross, S.P. (2008). Consequences of Motor Copy Number on the Intracellular  
422 Transport of Kinesin-1-Driven Lipid Droplets. *Cell*.
- 423 26. Encalada, S.E., Szpankowski, L., Xia, C.H., and Goldstein, L.S. (2011). Stable kinesin  
424 and dynein assemblies drive the axonal transport of mammalian prion protein vesicles.  
425 *Cell* 144, 551–565.
- 426 27. Geeraert, C., Ratier, A., Pfisterer, S.G., Perdiz, D., Cantaloube, I., Rouault, A., Patingre,  
427 S., Proikas-Cezanne, T., Codogno, P., and Poüs, C. (2010). Starvation-induced  
428 hyperacetylation of tubulin is required for the stimulation of autophagy by nutrient

- 429 deprivation. *J. Biol. Chem.*
- 430 28. Yu, F.X., and Guan, K.L. (2013). The Hippo pathway: regulators and regulations. *Genes*  
431 *Dev* 27, 355–371.
- 432 29. Sciarretta, S., Zhai, P., Maejima, Y., DelRe, D.P., Nagarajan, N., Yee, D., Liu, T.,  
433 Magnuson, M.A., Volpe, M., Frati, G., *et al.* (2015). mTORC2 regulates cardiac response  
434 to stress by inhibiting MST1. *Cell Rep.*
- 435 30. Hansen, M., Rubinsztein, D.C., and Walker, D.W. (2018). Autophagy as a promoter of  
436 longevity: insights from model organisms. *Nat. Rev. Mol. Cell Biol.*
- 437 31. Tammineni, P., Ye, X., Feng, T., Aikal, D., and Cai, Q. (2017). Impaired retrograde  
438 transport of axonal autophagosomes contributes to autophagic stress in Alzheimer’s  
439 disease neurons. *Elife.*
- 440 32. Bauer, D.E., Canver, M.C., and Orkin, S.H. (2014). Generation of Genomic Deletions in  
441 Mammalian Cell Lines via CRISPR/Cas9. *J. Vis. Exp.*
- 442 33. Hutt, D.M., Loguercio, S., Campos, A.R., and Balch, W.E. (2018). A Proteomic Variant  
443 Approach (ProVarA) for Personalized Medicine of Inherited and Somatic Disease. *J. Mol.*  
444 *Biol.*
- 445 34. Sakurai, S., Tomita, T., Shimizu, T., and Ohto, U. (2017). The crystal structure of mouse  
446 LC3B in complex with the FYCO1 LIR reveals the importance of the flanking region of the  
447 LIR motif. *Acta Crystallogr. Sect. F Struct. Biol. Commun.*
- 448 35. Coutu, D.L., Kokkaliaris, K.D., Kunz, L., and Schroeder, T. (2017). Three-dimensional  
449 map of nonhematopoietic bone and bone-marrow cells and molecules. *Nat. Biotechnol.*
- 450 36. Neumann, S., Chassefeyre, R., Campbell, G.E., and Encalada, S.E. (2017).  
451 KymoAnalyzer: a software tool for the quantitative analysis of intracellular transport in  
452 neurons. *Traffic.*
- 453

454 **METHODS**

455 *Mammalian Cell Culture*

456 See Reagents Table for details of all cells and reagents employed. HEK 293T cells, HeLa  
457 cells, and N2A neuroblastoma cells were purchased from ATCC. Immortalized wild-type (WT)  
458 and STK4-deficient mouse embryonic fibroblasts (MEFs) were produced as described [6]. Cell  
459 lines were cultured in DMEM (Corning) supplemented with 10% fetal bovine serum (FBS,  
460 Gibco), referred to as “normal medium,” and were routinely checked for mycoplasma using the  
461 MycoScope PCR detection kit according to the manufacturer’s instructions (GenLantis).

462 Mouse hippocampal neurons were isolated from newborn BALB/c mice and cultured as  
463 described [26]. Briefly, hippocampi were dissected from 1- or 2-day-old mice, treated with  
464 papain (Worthington) for 15 min, and disrupted by aspirating through a micropipette tip 7 to 10  
465 times. Dissociated neurons were resuspended in normal medium and plated in 24-well plates  
466 containing 12-mm glass coverslips pretreated with 50 µg/ml poly-L-lysine (Sigma) in borate  
467 buffer. The medium was exchanged for Neurobasal-A medium (Gibco) containing 2% B-27  
468 (Gibco) and 0.25% GlutaMAX (Gibco) 1 h after plating.

469

470 *Plasmids and oligonucleotides*

471 Plasmids encoding EGFP-tagged WT LC3B and phospho-mutants (T50A and T50E) were  
472 obtained as described [6]. Plasmids encoding HA-tagged LC3B proteins were generated by  
473 replacing the EGFP sequence in the EGFP plasmids with an HA-tag followed by a Tobacco etch  
474 virus protease sequence recognition site and a Flag-Tag (Genewiz) using *AgeI* and *HindIII* (New  
475 England Biolabs). Lipidation-deficient LC3B proteins were generated by mutagenic PCR using  
476 Q5 Hot Start High-Fidelity Master Mix (New England Biolabs) to introduce the GGG to GCT  
477 change that leads to a glycine to alanine (G120A) mutation. Bacterial expression plasmids  
478 encoding His-tagged WT, T50A, and T50E LC3B proteins were produced as described [6]. A  
479 plasmid encoding mCherry-tagged FYCO1 was generated by cloning the mCherry-FYCO1 gene

480 from a pBABE-puro-mCherry-FYCO1 plasmid (University of Dundee) into the plasmid backbone  
481 of EGFP-LC3B (Addgene) by amplification of fragments using Q5 Hot Start High-Fidelity Master  
482 Mix and ligation using a Gibson Assembly Master Mix (New England Biolabs). pLKO.1-puro  
483 plasmids encoding scrambled shRNA and five FYCO1-targeted shRNAs were purchased from  
484 Sigma Aldrich. For details on oligonucleotides refer to (**Table S1**).

485

#### 486 *Generation of HeLa LC3B Knockout Cells*

487 *LC3B* gene knockout (KO) was performed using the CRISPR-CAS9 system according to a  
488 published protocol [32]. Briefly, HeLa cells were transfected with two plasmids encoding GFP-  
489 CAS9 (Addgene) and an sgRNA targeting the first or the fourth exon of the *LC3B* gene. After 24  
490 h, GFP-positive cells were sorted by FACS and single cells were placed in 96-well plates.  
491 Clones were grown for 2–3 weeks and analyzed for gene deletion by PCR. Gene-edited clones  
492 were expanded in 24-well plates, and LC3B protein deficiency was confirmed by western  
493 blotting and immunofluorescence microscopy. LC3B-KO cells were selected, expanded, and  
494 frozen before use in experiments.

495

#### 496 *Gene Silencing, Transient Transfection, and Cell Treatment*

497 Cells were reverse transfected with 10 nM of non-silencing control or gene-targeting siRNAs  
498 (siNS, siFYCO1, or siSTK4; Dharmacon) using Opti-MEM and lipofectamine RNAiMAX  
499 according to the supplier's recommendations (Life Technologies). After 48 h, cells were  
500 collected and used for experiments. Transient plasmid transfections were performed using Opti-  
501 MEM and Lipofectamine 2000 (Life Technologies), and cells were collected for experiments 24  
502 h after transfection. For experiments with cells expressing siRNAs and plasmids, cells were  
503 transfected with siRNAs for 24 h and then transfected with the plasmid of interest for an  
504 additional 24 h before analysis.

505 For autophagy flux assays, cells were washed three times with normal medium, normal  
506 medium containing the late-autophagy blocking compound bafilomycin A<sub>1</sub> (BafA, Sigma) at 50  
507 nM, or starvation medium (Earle's Balanced Salt Solution (Life Technologies) before incubation  
508 in the same media for the indicated times at 37°C.

509

#### 510 *Affinity purification*

511 HeLa LC3B-KO cells, 293T cells, MEFs, or N2A cells were transiently transfected with plasmids  
512 (6.6 µg/10<sup>6</sup> cells) encoding HA-LC3B-WT or HA-T50A for 24 h, incubated with normal medium  
513 or starvation medium for 1 h, and then lysed with IP lysis buffer (0.5% NP-40, 150 mM NaCl, 50  
514 mM Tris HCl, pH 7.5, protease inhibitors [cOmplete, Roche], and phosphatase inhibitors  
515 [PhosStop, Roche]). Cell lysates were clarified by serial centrifugation (600 ×g for 3 min and  
516 9300 ×g for 10 min) and diluted 1.25-fold with lysis buffer. An aliquot of the lysate (5%) was  
517 reserved as input for western blotting and the remaining lysate was incubated with anti-HA  
518 magnetic beads (Pierce) overnight at 4°C. Beads were washed seven times with wash buffer  
519 (0.1% NP-40, 150 mM NaCl, 50 mM Tris HCl, pH 7.5) and three times with 50 mM Tris HCl, pH  
520 7.5. Samples were then processed for mass spectrometry or western blot analysis as described  
521 below. For immunoprecipitation of mCherry-FYCO1, the same protocol was performed using  
522 anti-RFP magnetic beads (MBL Life Science).

523

#### 524 *Mass Spectrometry*

525 Mass spectrometry was performed at the Proteomics Core of Sanford Burnham Prebys Medical  
526 Discovery Institute. Proteins immunoprecipitated as described above were subjected to on-bead  
527 digestion as previously described [33]. The total peptide concentration was determined using a  
528 NanoDrop spectrophotometer (Thermo Fisher) and the samples were then analyzed by LC-  
529 MS/MS using a Proxeon EASY nanoLC system (Thermo Fisher Scientific) coupled to a Q-  
530 Exactive Plus mass spectrometer (Thermo Fisher Scientific). Peptides were separated using an

531 analytical C18 Acclaim PepMap column (75  $\mu\text{m}$   $\times$  250 mm, 2  $\mu\text{m}$  vesicles; Thermo Scientific)  
532 and a 180-min gradient at a flow rate of 300  $\mu\text{l}/\text{min}$ : 1% to 5% B in 1 min, 5% to 20% B in 139  
533 min, 20% to 35% B in 30 min, and 35% to 45% B in 10 min (A = formic acid 0.1%; B = 80%  
534 acetonitrile + 0.1% formic acid). Mass spectrometry settings were as described previously [33].  
535 Mass spectra were analyzed with MaxQuant software version 1.5.5.1. Peptides were searched  
536 against the *Homo sapiens* Uniprot protein sequence database (downloaded July 2018) and  
537 GPM cRAP sequences (commonly known protein contaminants), as described [33]. Statistical  
538 analysis was performed using an in-house R script (version 3.5.1) and SAINTq.

539

#### 540 *Western blot analysis*

541 Reserved input lysate (20  $\mu\text{g}$  of total protein) or immunoprecipitated materials from affinity  
542 purifications were analyzed by standard western blotting protocols. Briefly, proteins were  
543 separated in Novex 4–12% acrylamide Bis-Tris gels (NuPage) and transferred to PVDF  
544 membranes. Membranes were blocked in Tris-buffered saline containing 0.05% Tween-20  
545 (TBST) and either 5% milk or 3% bovine serum albumin (BSA), according to the antibody  
546 manufacturer's recommendations, and then incubated for 2 h at room temperature with primary  
547 antibodies diluted in 1% milk or 3% BSA in TBST with gentle rocking. Blots were washed three  
548 times (total 30 min) and incubated with horseradish peroxidase (HRP)-conjugated anti-mouse or  
549 anti-rabbit secondary antibodies (Cell Signaling Technologies) for 1 h at room temperature with  
550 gentle rocking. Blots were washed again and developed with Pierce ECL Western Blotting  
551 substrate (Base, SuperSignal West Pico/Femto, depending on protein levels) and visualized  
552 using a Bio-Rad ChemiDoc Imaging System or with HyBlot CL autoradiography films (Denville).  
553 Quantification of band intensity was carried out using Image Lab (Bio-Rad) or ImageJ (National  
554 Institutes of Health) software.

555



556 *In Vitro Phosphorylation of LC3B and Co-immunoprecipitation of FYCO1*

557 Aliquots of 3  $\mu$ g of GST-LC3B (Viva Bioscience) were incubated alone or with 250 ng of His-  
558 STK4 (Millipore) in *in vitro* kinase reaction buffer (10 mM  $MgCl_2$ , 1 mM EGTA, 1 mM  
559 dithiothreitol, 0.5  $\mu$ M ATP, 20 mM Tris, pH 7.5) for 1 h at 30°C. The *in vitro* kinase reaction  
560 mixtures were incubated with 350  $\mu$ l clarified lysate of HeLa LC3B-KO cells ( $8 \times 10^5$  cell  
561 equivalents, prepared as described above) and glutathione-sepharose beads (Bioworld) for 3 h  
562 at 4°C on a rotator. As a negative control, the same procedure was performed with a mock *in*  
563 *vitro* reaction buffer lacking GST-LC3B and His-STK4. Sepharose beads were washed seven  
564 times with wash buffer (0.1% NP-40, 150 mM NaCl, 50 mM Tris HCl, pH 7.5) and eluted by  
565 heating in Laemmli sample buffer at 95°C for 10 min. Samples were passed through a 0.45  $\mu$ m  
566 cellulose acetate filter (Costar) and then subjected to western blot analysis.

567

568 *Biolayer Interferometry*

569 Cultures (500 ml) of Rosetta™ 2(DE3) pLysS *E. coli* (Millipore) expressing human LC3B-WT,  
570 T50A, or T50E [6] were grown to an optical density of 0.4–0.6 at 600 nm, and recombinant  
571 protein expression was induced by addition of 0.5 mM isopropyl- $\beta$ -D-thiogalactopyranoside  
572 (VWR) for 16–18 h at 25°C. Bacteria were harvested by centrifugation and lysed with a  
573 microfluidizer in 50 mM Tris-HCl (pH 8.0), 300 mM NaCl, 30 mM imidazole, and 2 mM  $\beta$ -  
574 mercaptoethanol (BME). The lysates were clarified by centrifugation, filtered, incubated with Ni-  
575 NTA beads for 1 h, and eluted in the same buffer containing 250 mM imidazole. The sample  
576 was then dialyzed overnight in Snakeskin dialysis tubing (3500 kDa pore size) in 50 mM Tris-  
577 HCl (pH 8.5), 100 mM NaCl, and 5 mM BME. The protein was concentrated using Amicon-3.5K  
578 filters and subjected to size exclusion chromatography on a Superdex 200 column (GE  
579 Healthcare). The concentration of eluted proteins was measured at 280 nm using a Nanodrop  
580 spectrophotometer and the proteins were verified by Coomassie Blue staining and western



581 blotting. Purified His-LC3B-WT, T50A, or T50E proteins were diluted to 3  $\mu\text{g}/\text{ml}$  in Dulbecco's  
582 phosphate-buffered saline (PBS; Gibco) containing 0.1% BSA and 0.02% Tween-20 and  
583 immobilized on NTA capture sensors (FortéBio). Human FYCO1 peptide (amino acids 1265–  
584 1298, containing the LIR and adjacent residues) [4] was synthesized by Biomatik and  
585 reconstituted at 2 mg/ml in DMSO. The binding reaction was performed using two-fold serial  
586 dilutions of FYCO1 peptide (0.5–20  $\mu\text{M}$ ). The association and dissociation phases were  
587 analyzed for 60 s and the curves were inverted to fit them to a 1:1 model. Affinity constants  
588 were calculated from the kinetic constant after normalization for the buffer control. All binding  
589 measurements were performed on an Octet Red instrument (FortéBio) and the results were  
590 processed using Octet software 10.0.1 (FortéBio).

591

#### 592 *Structural Representation of the LC3B–FYCO1-LIR Complex*

593 The crystal structure of a *Mus musculus* complex between LC3B and FYCO1-LIR peptide (PDB  
594 5WRD) [34] was represented in cartoon form using Pymol software. Distance measurements  
595 between T50 in LC3B and D1235 and D1236 adjacent to FYCO1-LIR (homologous to amino  
596 acids D1276 and 1277 in *Homo sapiens* FYCO1) were performed with Coot (Crystallographic  
597 Object-Oriented Toolkit) software and were found to be consistent with hydrogen bonding  
598 distances. The *Mus musculus* FYCO1-LC3B complex structure was chosen for representation  
599 because coverage of the FYCO1 peptide sequence was greater than in the human structure.

600

601

#### 602 *Fluorescence and Confocal Microscopy*

603 Cells ( $2 \times 10^5$ ) were seeded in 24-well plates containing 12-mm glass coverslips, transiently  
604 transfected with the appropriate plasmids, and treated with normal or starvation medium as  
605 described above. After treatment, cells were fixed with 4% paraformaldehyde in PBS for 20 min

606 and processed for fluorescence microscopy using standard protocols  
607 (<https://www.cellsignal.com>). Briefly, cells were incubated with primary antibodies against  
608 FYCO1 or autophagosomal and lysosomal proteins (see Reagents table) diluted in PBS  
609 containing 10% FBS and 0.2% saponin for 2 h at room temperature. Cells were then washed  
610 three times with PBS and incubated with Alexa Fluor 488- or 568-labeled secondary antibodies  
611 (Thermo Fisher) diluted at 1:1000 in PBS/10% FBS/0.2% saponin for 1 h at room temperature.  
612 Cells were washed three times in PBS, incubated with 4',6-diamidino-2-phenylindole (DAPI) to  
613 label nuclei, and mounted with Prolong® Gold Antifade Reagent. Imaging was performed using  
614 a Zeiss LSM 710 NLO confocal microscope. For each condition, 15 to 20 images were acquired  
615 in randomly selected fields with a PlanAchromat 63X/1.4 DIC oil objective lens. An average of  
616 10 to 15 stacks of 0.3  $\mu\text{m}$  thickness were acquired.

617

### 618 *Image Analysis*

619 Autophagosomes were quantified using Imaris 9.3.0 (Bitplane, Zurich). Confocal images of  
620 individual cells were processed using the software “spots” feature with an estimated diameter of  
621 0.5  $\mu\text{m}$  and then corrected using the “different spot sizes: region growing” feature. Thresholds  
622 were set using the “Quality” feature and determined manually. The local contrast threshold for  
623 region-growing spots was then manually set and maintained. Punctae were counted manually in  
624 2–3 cells per condition and compared with the Imaris software counts to verify the accuracy and  
625 precision of measurements. The “surface” feature was used to reconstruct the nucleus of each  
626 cell using DAPI staining. Following generation of spots and surface objects, distance  
627 transformation was performed between the outer nuclear surface and the LC3B-positive  
628 punctae. Distances for individual punctae were exported to Excel (Microsoft) and processed.  
629 The distance from the nucleus of each punctum were averaged for each cell and the collective  
630 average of all punctae from all cells were represented as a single data point. Additionally, all  
631 distances for each condition were pooled and represented as relative frequency distributions

632 with a best-fit line (non-linear regression, Gaussian curve) for interpretation. The same  
633 procedures were performed for LAMP-1 (endolysosomal marker; estimated punctum diameter =  
634 0.33  $\mu\text{m}$ ). Co-localization data for FYCO1 and LC3B were processed using Imaris software  
635 using two methods. In the first method (main figures), spots were generated for LC3B and  
636 FYCO1 punctae in the manner described above. Then the “co-localize spots” software feature  
637 was used to identify LC3B and FYCO1 punctae located within very close proximity ( $<0.5 \mu\text{m}$ ).  
638 These co-localized events were normalized to the total number of LC3B punctae and the data  
639 are presented as the mean percentage of LC3B/FYCO1 co-localization events. In the second  
640 method (supplemental figures), FYCO1- or LC3B-labeled channels were provided appropriate  
641 co-localization thresholds in the software “co-loc” feature using the “Polygon” tool. The same  
642 channel thresholds were maintained for all cells, and the most intense fluorescent overlap was  
643 quantified by Imaris as voxels (i.e., overlap between volumetric pixels in either channel) as  
644 described [35]. The voxel value for each cell was averaged for each condition and used as a  
645 single data point for statistical analysis.

646

#### 647 *Live-Cell Imaging and LC3B Particle Tracking in HeLa Cells*

648 HeLa LC3B-KO cells ( $2 \times 10^5$ ) were seeded in 35-mm glass-bottom dishes (MatTek) for 24 h and  
649 transfected with GFP-tagged LC3B expression plasmids as described above. The medium was  
650 then replaced and the cells were imaged 2 h later with a Zeiss LSM 880 Rear Port Laser  
651 Scanning Confocal and Airyscan FAST microscope equipped with a stage pre-heated to  $37^\circ\text{C}$ .  
652 Approximately 9 to 10 cells per condition were randomly selected for imaging using a  
653 PlanAchromat 63X/1.4 DIC oil objective lens with single photon lasers emitting at 488 nm.  
654 Each cell was imaged for 3 min (360 frames, 2 frames/s) and, on average, 8–10 slices were  
655 acquired through a total cell thickness of  $\sim 2.0$ – $2.5 \mu\text{m}$  to ensure the complete punctum was  
656 captured for particle tracking in four dimensions. Following raw image acquisition, the movies

657 were deconvoluted and a maximum Z-projection was generated using Zen Processing software.  
658 The movie files were further processed prior to particle tracking using Imaris image processing  
659 functions. The background subtraction function was set at 0.33  $\mu\text{m}$  and a Gaussian-smoothing  
660 operation was used to remove the cytosolic GFP signal and to sharpen the visible punctae to  
661 improve particle tracking. GFP-positive punctae were marked using the spots feature of Imaris,  
662 with an estimated diameter of 0.5  $\mu\text{m}$  for an individual punctum. An appropriate threshold was  
663 set to label all punctae visualized and was maintained for all movies analyzed. For particle  
664 tracking, the autoregressive motion algorithm was selected with 5–10  $\mu\text{m}$  of maximum  
665 “predicted distance” and a maximum “gap distance” between 2 and 4  $\mu\text{m}$ . Initial tracks were  
666 generated by Imaris and then manually curated and corrected to ensure each particle was  
667 assigned to the appropriate track for the duration of the movie. A reference frame was added  
668 over the nucleus and the general tracking statistics were exported to Excel for full processing.  
669 The final displacement relative to the reference frame labeled nucleus was subtracted from the  
670 initial displacement and each individual track was designated either “anterograde” or  
671 “retrograde.” The percent deviation from equal directional transport (50% anterograde, 50%  
672 retrograde) was pooled for each cell and the mean was taken as a single data point for  
673 statistical analysis. To quantify directional switches in particle movement, the complete track  
674 and trajectories showed by every single particle were displayed and directional switches were  
675 arbitrarily determined and quantified by two independent people using visual inspection of  
676 individual tracks.

677

678

### 679 *LC3B Particle Transport in Mouse Hippocampal Neurons*

680 Hippocampal neurons were plated on 12-mm glass coverslips in 24-well plates, cultured for 8 to  
681 10 days, and then transfected using 2  $\mu\text{L}$  of Lipofectamine 2000 (Life Technologies) and 1.6  $\mu\text{g}$   
682 of DNA per well with the GFP-LC3B expression plasmids with or without scrambled shRNA or a

683 mixture of five FYCO1-targeting shRNAs (Sigma Aldrich). The efficiency of shRNAs targeting  
684 *Fyco1* in mouse cells were verified in N2A neuroblastoma cells (**Figure S4D**), a proxy for  
685 primary neurons in which LC3B phospho-mutants displayed autophagy phenotypes similar to  
686 other cell types (**Figure S4E-F**). At 48 h post-transfection, the mid-axon region of neurons was  
687 imaged using a Nikon Ti-E Perfect Focus inverted microscope equipped with a total internal  
688 reflection fluorescence (TIRF) setup, an Andor iXon + DU897 EM camera, and a 100X/1.49 NA  
689 oil objective. A 488 nm laser was used for detection of GFP. Lasers were positioned at an angle  
690 for pseudo-TIRF acquisition. Each neuron was imaged for 5 min (300 frames, 1 frame/s). Axons  
691 were distinguished from dendrites by morphology [26], and the polarity of axons was determined  
692 by identification of soma and axonal termini for each movie. Axonal transport analysis was  
693 performed using KymoAnalyzer, a freely available ImageJ-based macro [36]. Briefly,  
694 kymographs were generated from time-lapse movies and particle trajectories were manually  
695 assigned from the kymograph images. Transport parameters, including direction, velocity, run  
696 length, time in motion, and pauses, were automatically calculated by KymoAnalyzer. A detailed  
697 description of all the transport parameters used in this study can be found in [36].

698

### 699 *Statistical Analysis*

700 Statistical analysis and graph generation was conducted using Prism 8.0 software (GraphPad).  
701 One-way and two-way ANOVA were performed to analyze single-grouped datasets (Figures 1B,  
702 1F, 2B, 4B, S1D, S2E and S4A) and double-grouped datasets (Figures 2D, 3C, 3E, 3G, S1C,  
703 S3E, and S4E), respectively. For all data sets, Tukey's multiple comparison test with a single  
704 pooled variance and Geisser–Greenhouse correction was performed. P values are summarized  
705 using the GraphPad reporting method: 0.1234 (ns), 0.0332 (\*), 0.0021 (\*\*), 0.0002 (\*\*\*), and  
706 <0.0001 (\*\*\*\*). For the analysis of LC3B transport in primary hippocampal neurons, most axonal  
707 transport parameters did not follow a normal distribution and we therefore used the non-  
708 parametric permutation t test (rndttest function of MATLAB [Mathworks]; Figure 4D, 4G, S4B

709 and S4F for those instances. For Figures 4E and S4F, parameter differences were analyzed  
710 using both the Rank Sum test (MATLAB [Mathworks]) and the Kolmogorov–Smirnov test  
711 (RStudio) adjusting p-values for multiple comparisons using Bonferroni.  
712

713 **REAGENTS USED IN THIS STUDY**

714

| REAGENT or RESOURCE                                      | SOURCE                                | IDENTIFIER              |
|----------------------------------------------------------|---------------------------------------|-------------------------|
| <b>Antibodies</b>                                        |                                       |                         |
| Rabbit polyclonal anti-FYCO1                             | Atlas Antibodies                      | HPA035526               |
| Rabbit monoclonal anti-LC3B (D11) XP                     | Cell Signaling Technologies (CST)     | 3868S                   |
| Rabbit polyclonal anti-MST1                              | GeneTex                               | GTX109294               |
| Rabbit polyclonal anti-LAMP1                             | Abcam                                 | ab24170                 |
| Rabbit polyclonal anti-p-MST1(Thr183)/MST2(Thr180)       | CST                                   | 3681S                   |
| Rabbit polyclonal anti pLC3B (Thr50)                     | 21 <sup>st</sup> Century Biochemicals | (Wilkinson et al. 2015) |
| Mouse monoclonal anti-mCherry (1C51)                     | Novus Biologicals                     | NBP1-96752              |
| Mouse monoclonal anti- $\beta$ -actin (C4)               | Millipore Sigma                       | MAB1501                 |
| Mouse monoclonal anti-HA (6E2)                           | CST                                   | 2367S                   |
| Mouse monoclonal anti- $\alpha$ -tubulin (DM1A)          | CST                                   | 3873P                   |
| Goat anti-Rabbit HRP                                     | CST                                   | 7074s                   |
| Goat anti-Mouse HRP                                      | CST                                   | 7076s                   |
| Goat anti-Rabbit Alexa Fluor 488                         | Thermo Fisher                         | A11034                  |
| Goat anti-Rabbit Alexa Fluor 568                         | Thermo Fisher                         | A11011                  |
| Goat anti-Mouse Alexa Fluor 488                          | Thermo Fisher                         | A11001                  |
| Goat anti-Mouse Alexa Fluor 568                          | Thermo Fisher                         | A11004                  |
| <b>Bacterial and Virus Strains</b>                       |                                       |                         |
| DH5 $\alpha$ competent <i>E. coli</i>                    | Thermo Fisher                         | 18265017                |
| One Shot Stbl3 <i>E. coli</i>                            | Thermo Fisher                         | C7373-03                |
| Rosetta™ 2(DE3)pLysS <i>E. coli</i>                      | Millipore Sigma                       | 71403                   |
| <b>Chemicals, Peptides, and Recombinant Proteins</b>     |                                       |                         |
| Dulbecco's Modified Eagle Medium (DMEM)                  | Corning                               | 10-013-CV               |
| Fetal bovine serum (FBS)                                 | Thermo Fisher                         | 26140049                |
| DMEM (for primary neurons)                               | Thermo Fisher                         | 11965                   |
| FBS (for primary neurons)                                | Thermo Fisher                         | 10082147                |
| Poly-L-lysine                                            | Millipore Sigma                       | P5899                   |
| Neurobasal-A medium                                      | Thermo Fisher                         | 10888022                |
| B-27                                                     | Thermo Fisher                         | 17504044                |
| GlutaMAX                                                 | Thermo Fisher                         | 35050061                |
| Earle's Balanced Salt Solution (EBSS): starvation medium | Thermo Fisher                         | 24010043                |
| Lipofectamine 2000                                       | Thermo Fisher                         | 11668019                |
| Opti-MEM                                                 | Thermo Fisher                         | 31985-070               |
| Bafilomycin A1                                           | Millipore Sigma                       | 88899-55-2              |
| DAPI                                                     | Millipore Sigma                       | D9542                   |
| RNAiMAX                                                  | Thermo Fisher                         | 13778150                |
| Saponin, from Quillaja pract.                            | Acros Organics                        | 74499-23-3              |

|                                                               |                         |                   |
|---------------------------------------------------------------|-------------------------|-------------------|
| N3500 Nonidet-P40 substitute                                  | US Biological           | 9036-19-5         |
| Bovine serum albumin (BSA), protease free                     | Akron                   | AK1391-0100       |
| cOmplete Protease Inhibitor Cocktail tablets                  | Millipore Sigma         | 11697498001       |
| PhosSTOP                                                      | Millipore Sigma         | 4906845001        |
| Pierce ECL Western Blotting Substrate                         | Thermo Fisher           | 32209             |
| SuperSignal™ West Pico PLUS Chemiluminescent Substrate        | Thermo Fisher           | 34577             |
| SuperSignal™ West Femto Maximum Sensitivity Substrate         | Thermo Fisher           | 34095             |
| Prolong® Gold Antifade Reagent                                | CST                     | 9071              |
| FYCO1 peptide (1265–1298 amino acids of the human protein)    | Biomatik                | N/A               |
| GST-LC3B                                                      | Viva Bioscience         | V32470-0500       |
| His-STK4                                                      | Millipore Sigma         | 14-624            |
| <b>Critical Commercial Assays</b>                             |                         |                   |
| Q5® Hot Start High-Fidelity 2X Master Mix                     | New England Biolabs     | M0494S            |
| Gibson Assembly® Master Mix                                   | New England Biolabs     | E2611L            |
| MycoScope PCR Mycoplasma Detection Kit                        | Genlantis               | MY01100           |
| <b>Experimental Models: Cell Lines</b>                        |                         |                   |
| Human: HEK 293T cells                                         | ATCC                    | CRL-3216          |
| Human: HeLa cells                                             | ATCC                    | CCL-2             |
| Human: HeLa cells lacking endogenous LC3B                     | This paper              | N/A               |
| Mouse: Immortalized MEFs                                      | (Wilkinson et al. 2015) | N/A               |
| Mouse: Immortalized STK3 <sup>+/-</sup> 4 <sup>-/-</sup> MEFs | (Wilkinson et al. 2015) | N/A               |
| Mouse: Primary hippocampal neurons                            | Encalada; BALB/c        | N/A               |
| Mouse: Neuro2a (N2A) neuroblastoma cells                      | ATCC                    | CCL-131           |
| <b>Oligonucleotides</b>                                       |                         |                   |
| ON-TARGETplus Control Pool: Non-Targeting pool                | Dharmacon               | D-001810-10-05    |
| ON-TARGETplus FYCO1 siRNA                                     | Dharmacon               | LQ-014350-01-0002 |
| ON-TARGETplus SMARTpool: Human STK4                           | Dharmacon               | L-004157-00-0005  |
| <b>Recombinant DNA</b>                                        |                         |                   |
| Plasmid: pHA-tag                                              | This paper              | N/A               |
| Plasmid: pHA-LC3B                                             | This paper              | N/A               |
| Plasmid: pHA-LC3B-T50A                                        | This paper              | N/A               |
| Plasmid: pHA-LC3B-T50E                                        | This paper              | N/A               |
| Plasmid: pHA-LC3B-G120A                                       | This paper              | N/A               |
| Plasmid: pHA-LC3B-T50A-G120A                                  | This paper              | N/A               |
| Plasmid: pHA-LC3B-T50E-G120A                                  | This paper              | N/A               |
| Plasmid: pHA-STK4                                             | This paper              | N/A               |
| Plasmid: pEGFP-LC3B                                           | This paper              | N/A               |



|                                                         |                              |                |
|---------------------------------------------------------|------------------------------|----------------|
| Plasmid: pEGFP-LC3B-T50A                                | Wilkinson 2015               | N/A            |
| Plasmid: pEGFP-LC3B-T50E                                | Wilkinson 2015               | N/A            |
| Plasmid: pBABE-mCherry-FYCO1                            | Univ. of Dundee              | DU45204        |
| Plasmid: pSpCas9(bb)-2A-GFP                             | Addgene                      | 48138          |
| Plasmid: pSpCas9(bb)-2A-GFP-LC3B Human A                | This paper                   | N/A            |
| Plasmid: pSpCas9(bb)-2A-GFP-LC3B Human B1               | This paper                   | N/A            |
| Plasmid: pSpCas9(bb)-2A-GFP-LC3B Human B2               | This paper                   | N/A            |
| pLKO.1-puro non-targeting (scramble) shRNA Control      | Millipore Sigma              | SHC016-1EA     |
| pLKO.1-puro FYCO1 shRNA 1                               | Millipore Sigma              | TRCN0000184601 |
| pLKO.1-puro FYCO1 shRNA 2                               | Millipore Sigma              | TRCN0000183567 |
| pLKO.1-puro FYCO1 shRNA 3                               | Millipore Sigma              | TRCN0000179990 |
| pLKO.1-puro FYCO1 shRNA 4                               | Millipore Sigma              | TRCN0000178746 |
| pLKO.1-puro FYCO1 shRNA 5                               | Millipore Sigma              | TRCN0000183006 |
| <b>Software and Algorithms</b>                          |                              |                |
| SAINTq software                                         | SourceForge                  | N/A            |
| In house R script (ver. 3.5.1, 64-bit)                  | SBP: Proteomics              | N/A            |
| Octet software 10.0.1                                   | FortéBio                     | N/A            |
| PyMOL 2.3                                               | Schrödinger                  | N/A            |
| Imaris 9.3.0                                            | Bitplane                     | N/A            |
| ImageJ                                                  | NIH                          | N/A            |
| Zen lite processing software                            | Zeiss                        | N/A            |
| Prism 8                                                 | GraphPad                     | N/A            |
| Microsoft Office: Excel, PowerPoint, Word               | Microsoft                    | N/A            |
| RStudio                                                 | RStudio Inc                  | N/A            |
| Image Lab                                               | Thermo Fisher                | N/A            |
| <b>Other Reagents</b>                                   |                              |                |
| Pierce Anti-HA magnetic beads                           | Thermo Fisher                | 88836          |
| Anti-RFP magnetic beads                                 | MBL Life Science             | M165-11        |
| 1-1/2 Micro glass coverslips – 12 mm diameter           | Electron Microscopy Sciences | 72230-01       |
| Premium microscope slides (Superfrost)                  | Thermo Fisher                | 12-544-7       |
| Spin-X centrifuge tube filter 0.45 µm cellulose acetate | Corning Inc.                 | 8162           |
| NuPAGE 4–12% Bis-Tris gels 1 mm × 10 wells              | Thermo Fisher                | NP0321BOX      |
| Premium autoradiography film (5 × 7 in.)                | Denville Scientific          | E3012          |
| Immobilon-P membrane, PVDF, 0.45 µm, 8.5 cm × 10 m roll | Millipore Sigma              | IPVH85R        |

## FIGURE 1

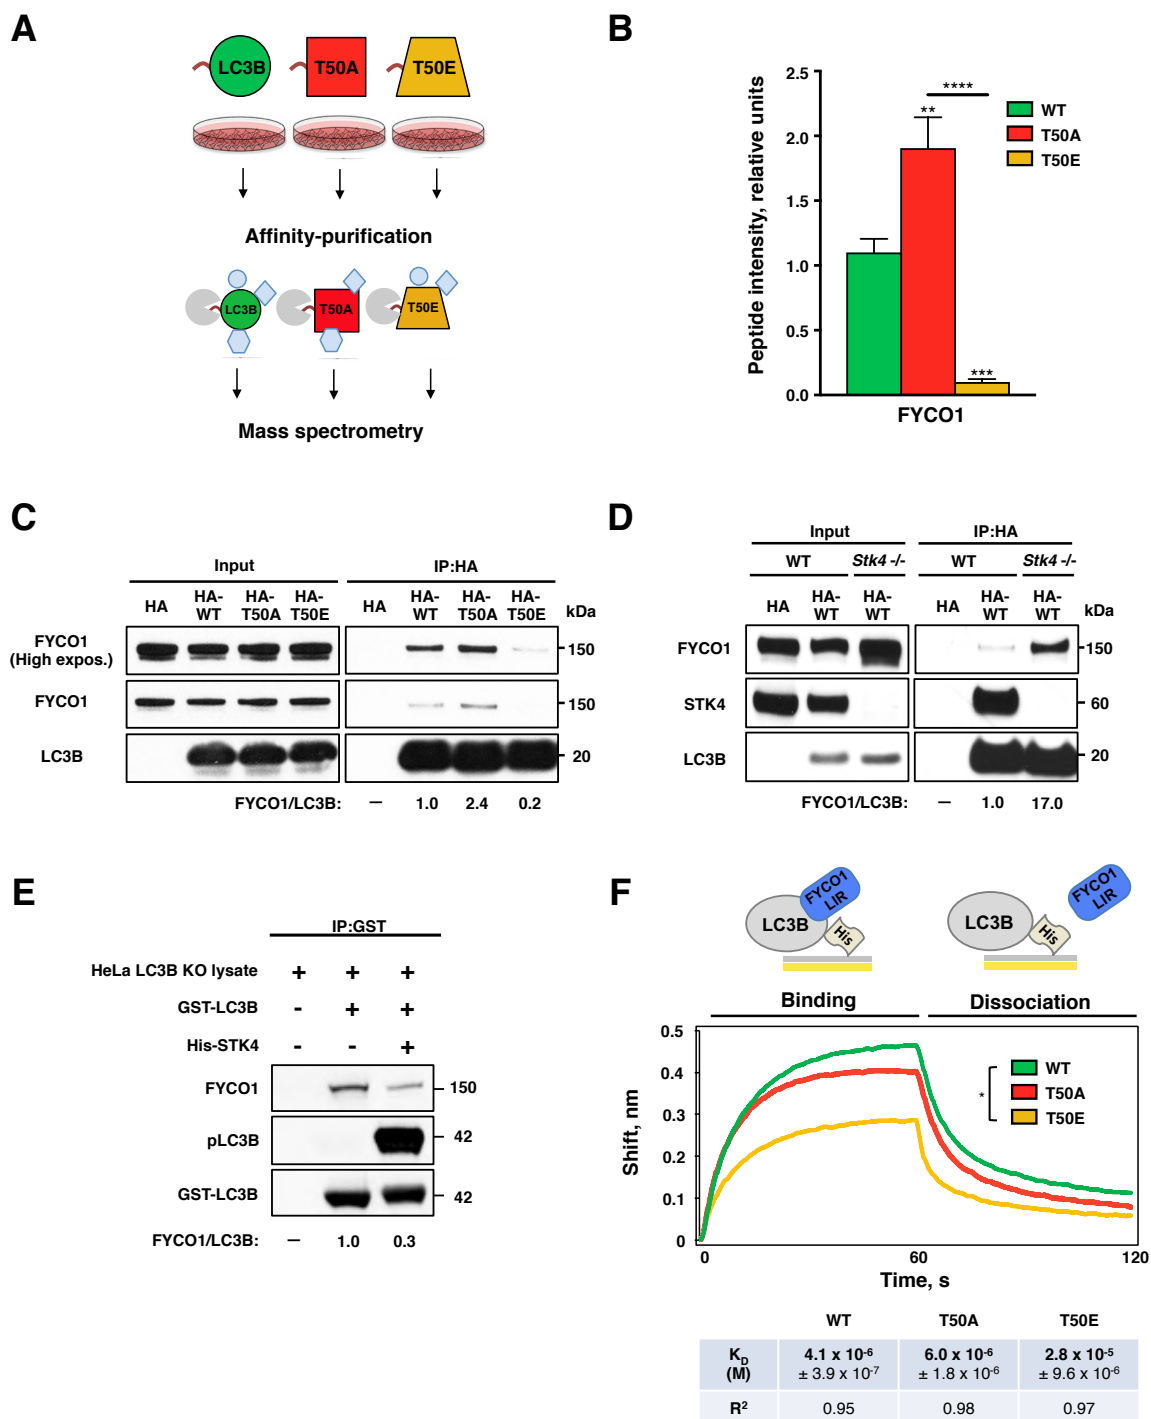

716

717

**FIGURE 2**

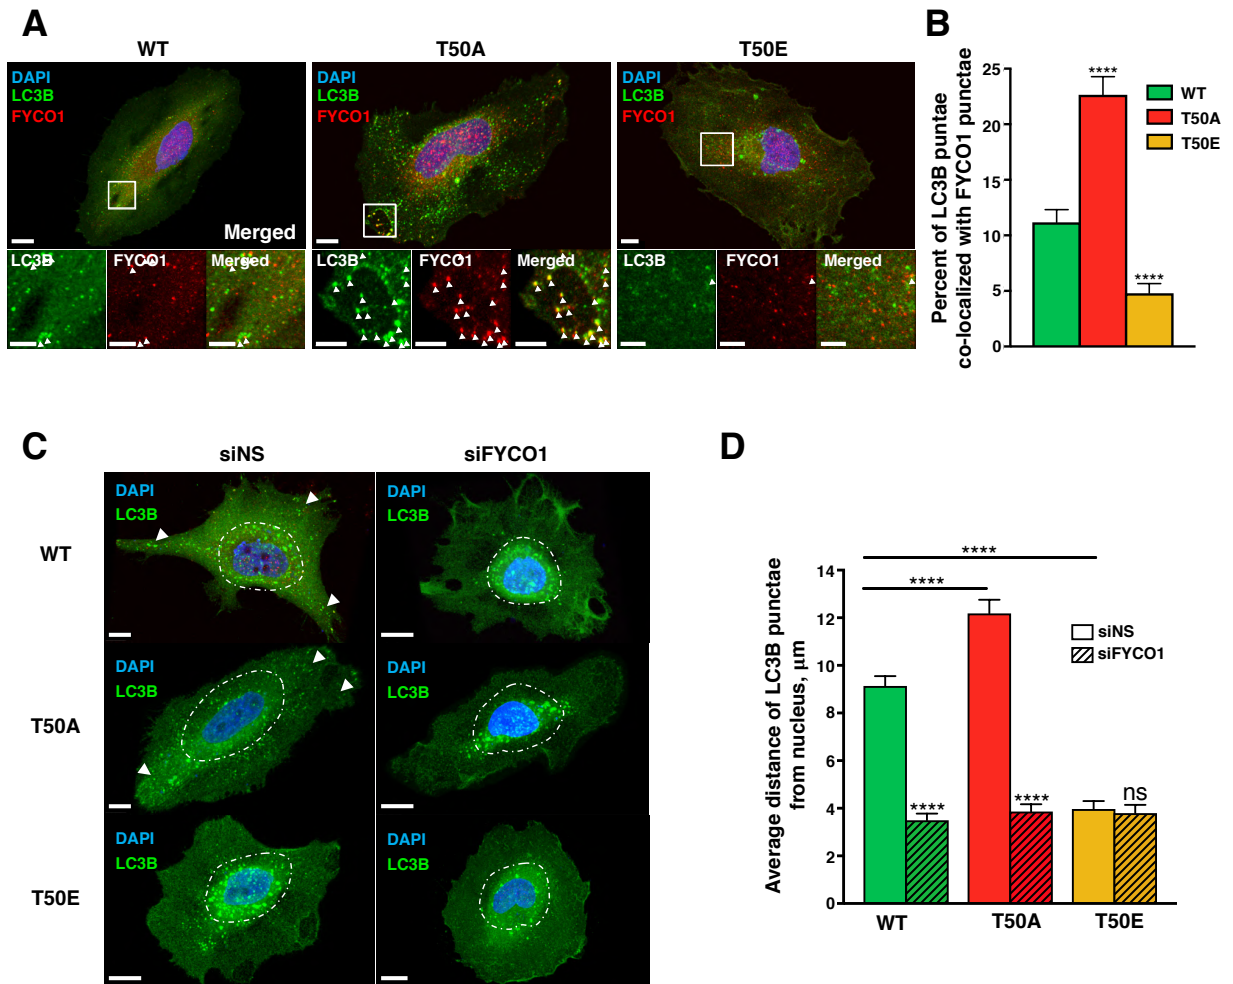

718

719

# FIGURE 3

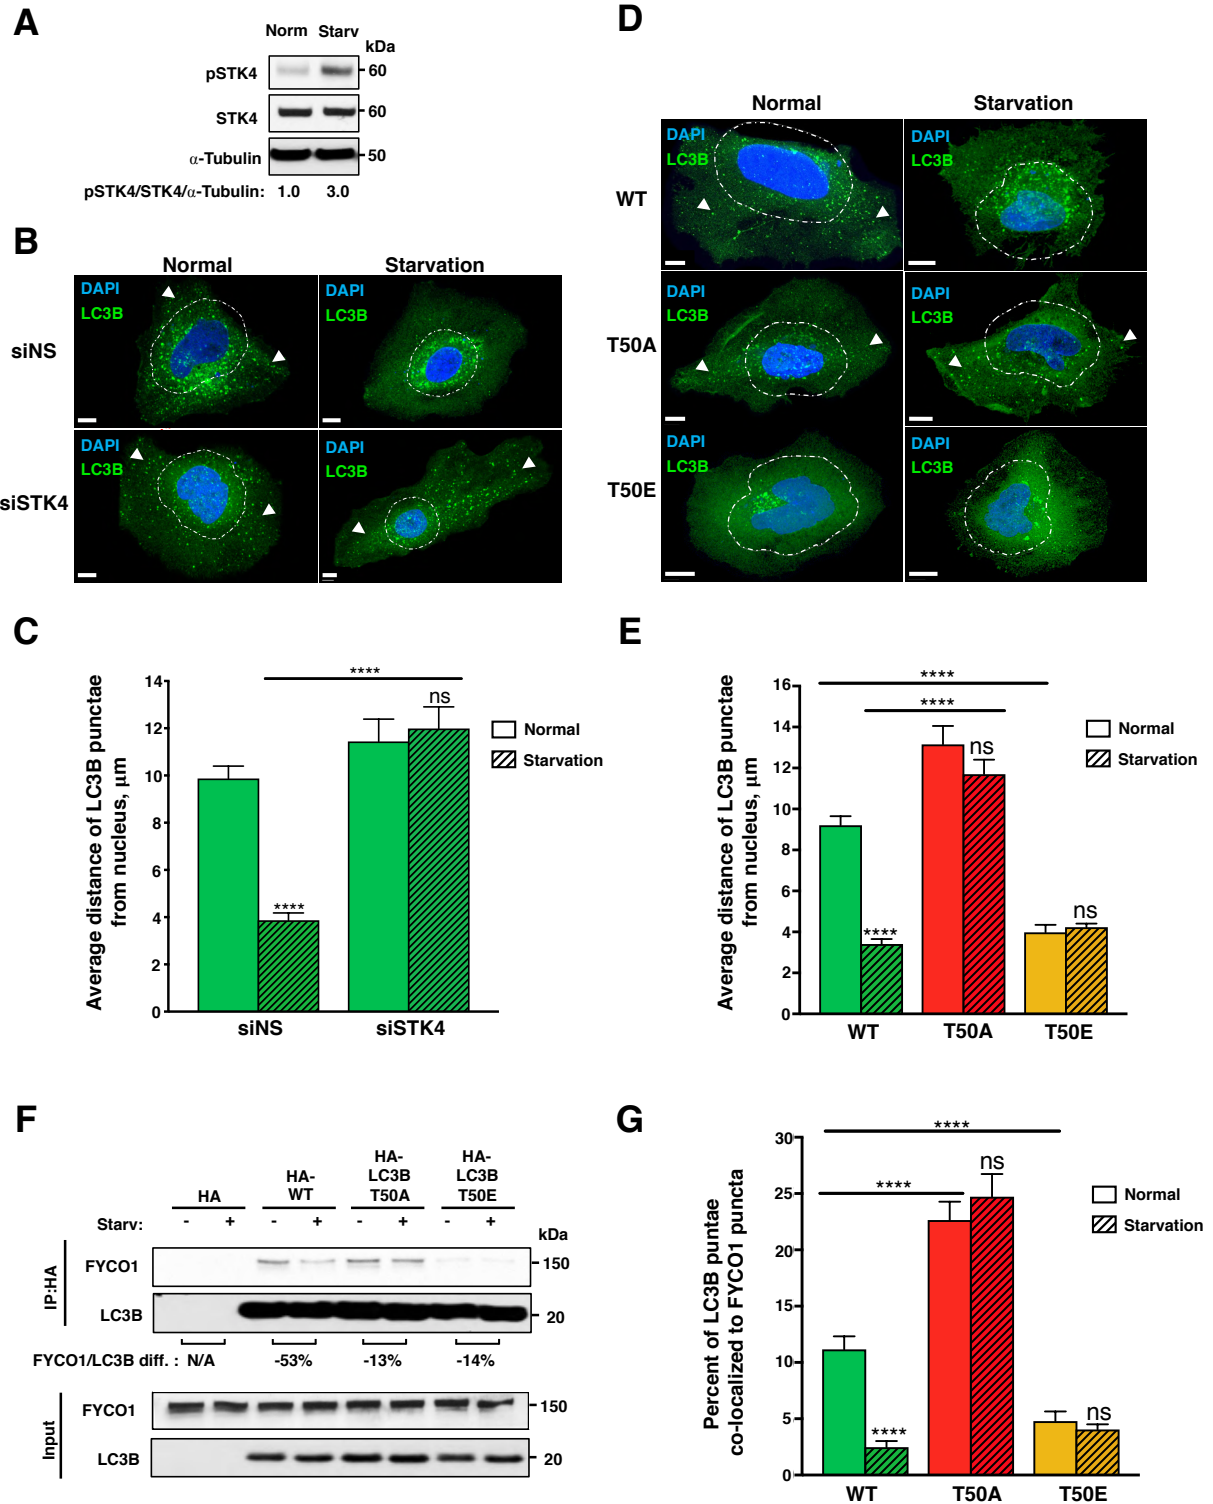

720

721

**FIGURE 4**

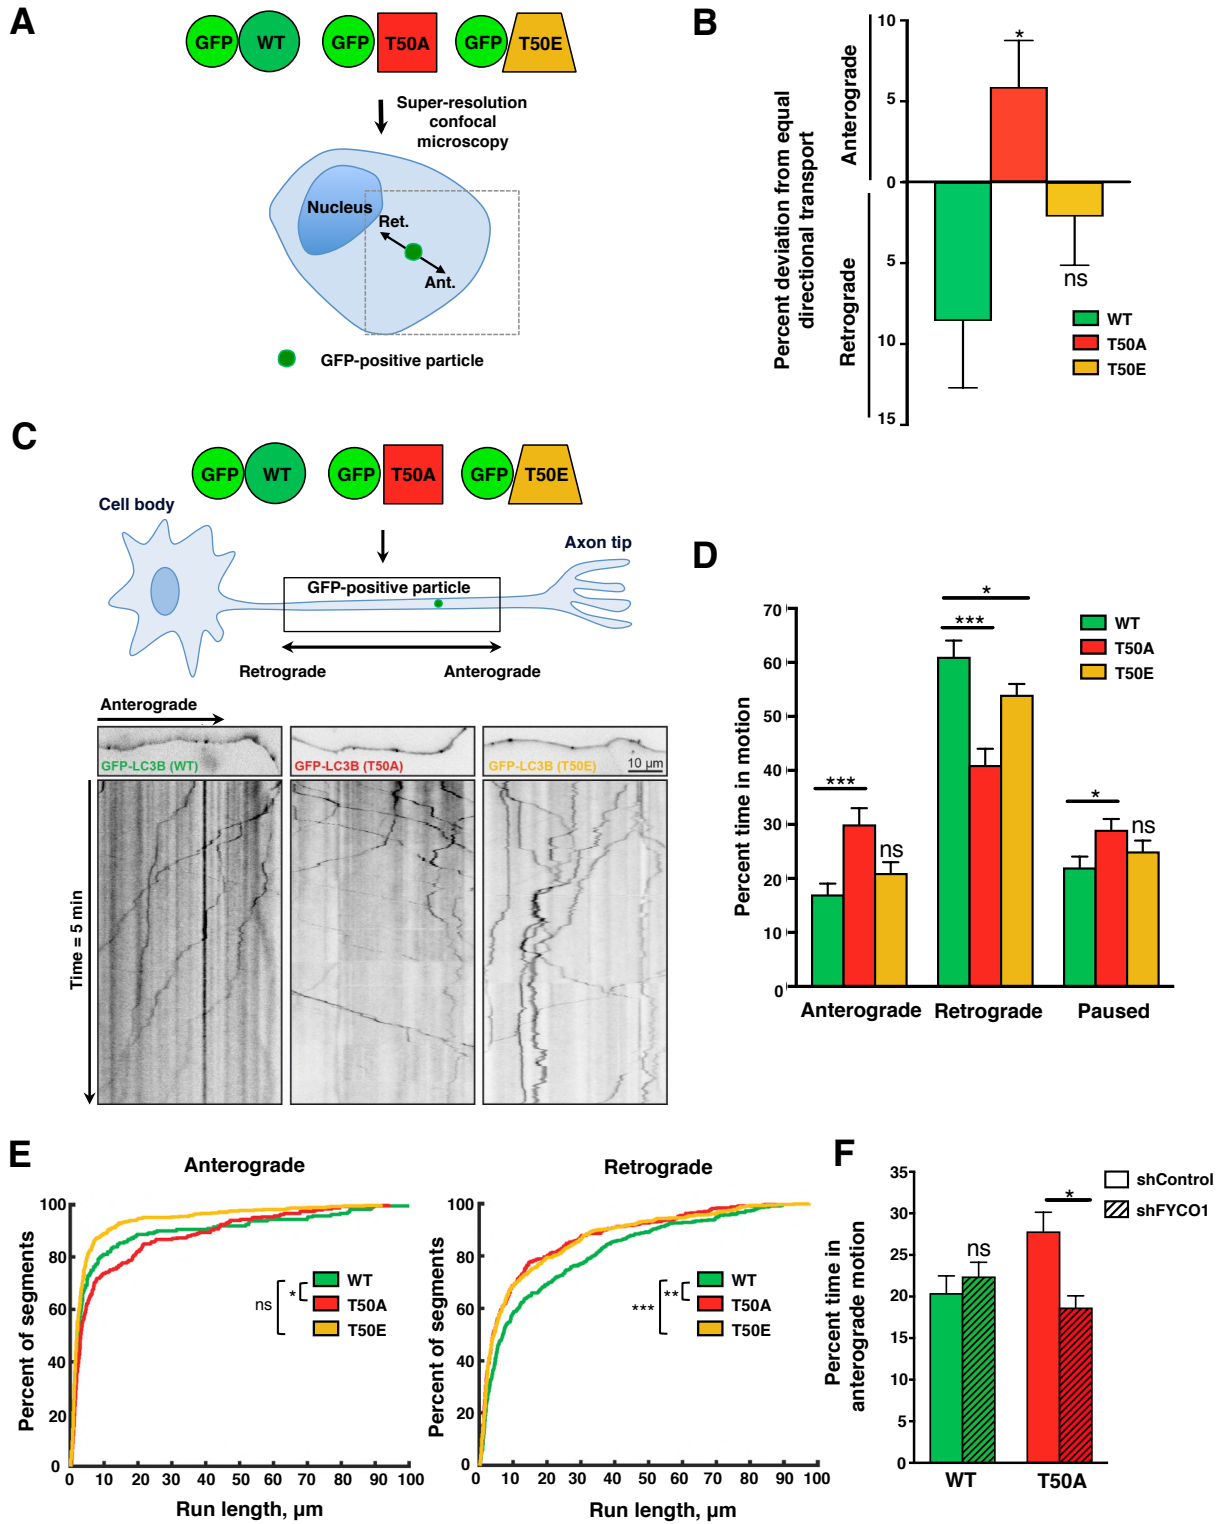

722

723

## Graphical abstract

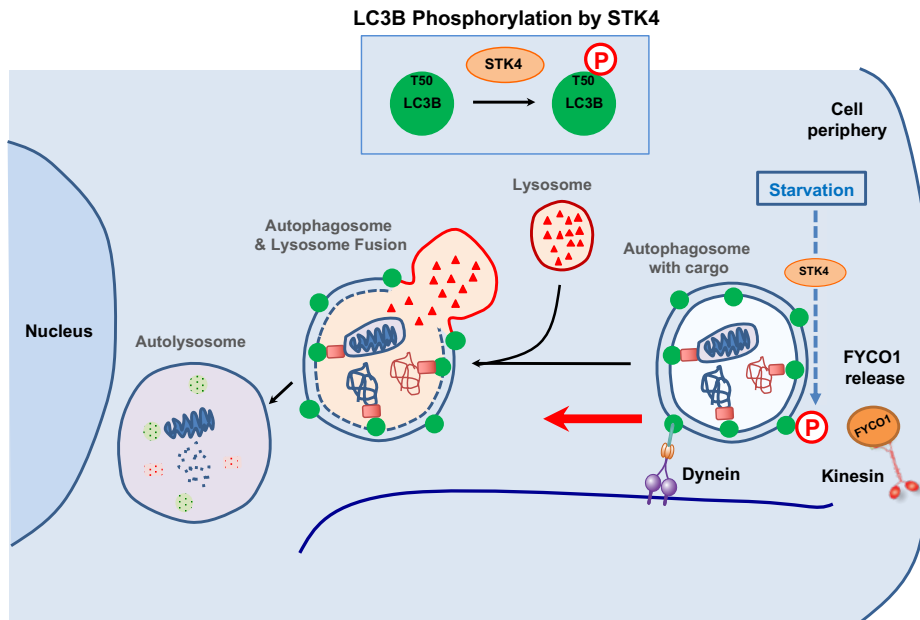

724

725

726 **SUPPLEMENTAL INFORMATION**

727 **Figure S1. Influence of LC3B phosphorylation on autophagy flux and lysosomal**  
728 **positioning in HeLa LC3B-KO cells.** (A) Representative immunofluorescence micrographs of  
729 HeLa WT, LC3B-KO, or LC3B-KO transfected with HA-LC3B. Cells were stained with anti-HA  
730 antibody (green). Arrowheads indicate LC3B-positive punctae (potential autophagosomes).  
731 Right panel shows western blot of LC3B in the WT and LC3B-KO cells (n=2). (B)  
732 Representative immunofluorescence micrographs of LC3B-KO HeLa cells transiently  
733 expressing HA-LC3B-WT, HA-T50A, or HA-T50E and incubated in normal medium (upper  
734 panels) or medium containing 50 nM bafilomycin A1 (BafA; lower panels) for 6 h. Cells were  
735 stained with anti-HA (green) and anti-LAMP1 (red) antibodies. Nuclei were stained with DAPI  
736 (blue). (C) Quantification of LC3B punctae in images shown in (B). Mean  $\pm$  SEM of n=15 cells  
737 from two experiments. \*\*\*\*p<0.00005 by two-way ANOVA. (D) Quantification of the distance  
738 between lysosomes and the cell nucleus. Mean  $\pm$  SEM of n=8–18 cells from two experiments.  
739 \*\*\*p<0.0005 by two-way ANOVA.

740

741 **Figure S2. LC3B phosphorylation modulates FYCO1–LC3B interactions in an LC3B**  
742 **lipidation-independent manner.** (A) Representative western blot of LC3B co-  
743 immunoprecipitated with mCherry-FYCO1 in HeLa LC3B-KO cells expressing the indicated HA-  
744 tagged LC3B proteins. FYCO1/LC3B values indicate the ratio of proteins (n=2). (B) Crystal  
745 structure of LC3B protein (gray) complexed with FYCO1-LIR (blue) (PDB 5WRD, *Mus*  
746 *musculus*) [34]. Potential hydrogen bonds (black dotted lines) between LC3B threonine 50 and  
747 two aspartic acid residues adjacent to the FYCO1-LIR are shown. (C) Representative  
748 immunofluorescence images of HeLa LC3B-KO cells expressing lipidation-deficient (G120A)  
749 HA-tagged LC3B proteins. Scale bar = 10  $\mu$ m. Punctae counts: WT =  $0.4 \pm 0.2$ , T50A =  $0.7 \pm$   
750  $0.2$ , T50E =  $0.2 \pm 0.1$ . n=10 cells from two experiments. (D) Representative western blot of

751 FYCO1 co-immunoprecipitated with HA-tagged LC3B constructs (WT, T50A, T50E) containing  
752 the G120A mutation, which prevents lipidation, in HeLa LC3B-KO cells. The mutant proteins  
753 were expressed at levels similar to those of their lipidation-proficient counterparts. FYCO1/LC3B  
754 values indicate the ratio of proteins (n=2). (E) Co-localization between FYCO1 and LC3B  
755 punctae “voxels” (volumetric pixels) in HeLa LC3B-KO cells expressing LC3B-WT, T50A, or  
756 T50E proteins. Mean  $\pm$  SEM of n=13–26 cells from three experiments. \*\*\*p<0.0002 by two-way  
757 ANOVA. (F) Representative western blot of FYCO1 in HeLa cells expressing control (NS) or  
758 FYCO1-targeting siRNAs. FYCO1/ $\alpha$ -tubulin values indicate the ratio of proteins (n=2).

759

760 **Figure S3. Effect of starvation and STK4 silencing on autophagosome positioning and**  
761 **FYCO1–LC3B colocalization.** (A) Relative frequency distribution of the distance between  
762 autophagosomes and the nucleus in HeLa cells co-expressing LC3B proteins and control (siNS)  
763 or FYCO1-targeting siRNA. The mean distances are shown and a non-linear regression best-fit  
764 line was overlaid on each distribution. The percentage of LC3B punctae located at distances  
765 greater than 25  $\mu$ m from the nucleus is also shown. n=24–34 cells from three experiments. (B)  
766 Representative western blot of STK4 levels in HeLa LC3B-KO cells treated with control (siNS),  
767 *Stk3*-targeting, or *Stk4*-targeting siRNAs. STK4/ $\alpha$ -tubulin values indicate the ratio of proteins  
768 (n=2). (C) As for (A) except HeLa LC3B-KO cells were transfected with control or STK4-  
769 targeting siRNA. n=24–34 cells from three experiments. (D) As for (A) except HeLa cells were  
770 incubated in normal or starvation medium. n=24–34 cells from three experiments. (E) FYCO1-  
771 LC3B co-localization (“voxels”) in HeLa LC3B-KO cells expressing the indicated LC3B proteins  
772 after incubation in normal or starvation medium. Mean  $\pm$  SEM of 13–27 cells from two  
773 experiments. \*\*\*p<0.0002 by two-way ANOVA.

774



775 **Figure S4. Conserved effects of LC3B phosphorylation status on autophagy and**  
776 **autophagosome transport in neuronal cells. (A)** Average percentage of LC3B-positive  
777 vesicles showing directional switches in HeLa LC3B KO cells. Mean  $\pm$  SEM of n=9–10 cells  
778 from two experiments. \*\*\*\*p<0.0001 by one-way ANOVA. **(B)** Cumulative frequency graphs of  
779 anterograde and retrograde segmental velocities of GFP-LC3B-positive vesicles in mouse  
780 primary neurons. n=26–29 cells from two experiments. \*p<0.05 by Rank Sum test. **(C)** Mean  
781 directional switches per particle per min of GFP-LC3B-positive vesicles in primary mouse  
782 neurons. Mean  $\pm$  SEM of n=26–29 cells from two experiments. \*p<0.05 by non-parametric  
783 permutation Student's t-test. **(D)** Representative western blot of FYCO1 levels in mouse N2A  
784 neuroblastoma cells expressing control (Scrambl) or *Fyco1*-targeting shRNAs. FYCO1/ $\alpha$ -tubulin  
785 values indicate the ratio of proteins (n=2). **(E)** Quantification of LC3B punctae in N2A  
786 neuroblastoma cells transiently expressing HA-tagged LC3B proteins. Cells were incubated for  
787 6 h in medium containing vehicle (DMSO) or 50 nM bafilomycin A1 (BafA). Mean  $\pm$  SEM of 9–12  
788 cells from two experiments. \*\*\*\*p<0.00005 by two-way ANOVA **(F)** Representative western blot  
789 of FYCO1 co-immunoprecipitated with HA-tagged LC3B proteins in N2A cells. FYCO1/LC3B  
790 values indicate the ratio of proteins (n=3).

791  
792 **Video S1, S2, and S3. Directional transport of LC3B-WT, T50A, and T50E vesicles in HeLa**  
793 **LC3B-KO cells.**

794  
795 **Video S4, S5, and S6. Directional transport of LC3B-WT, T50A, and T50E vesicles in**  
796 **mouse primary neurons.**

797

798

# FIGURE S1

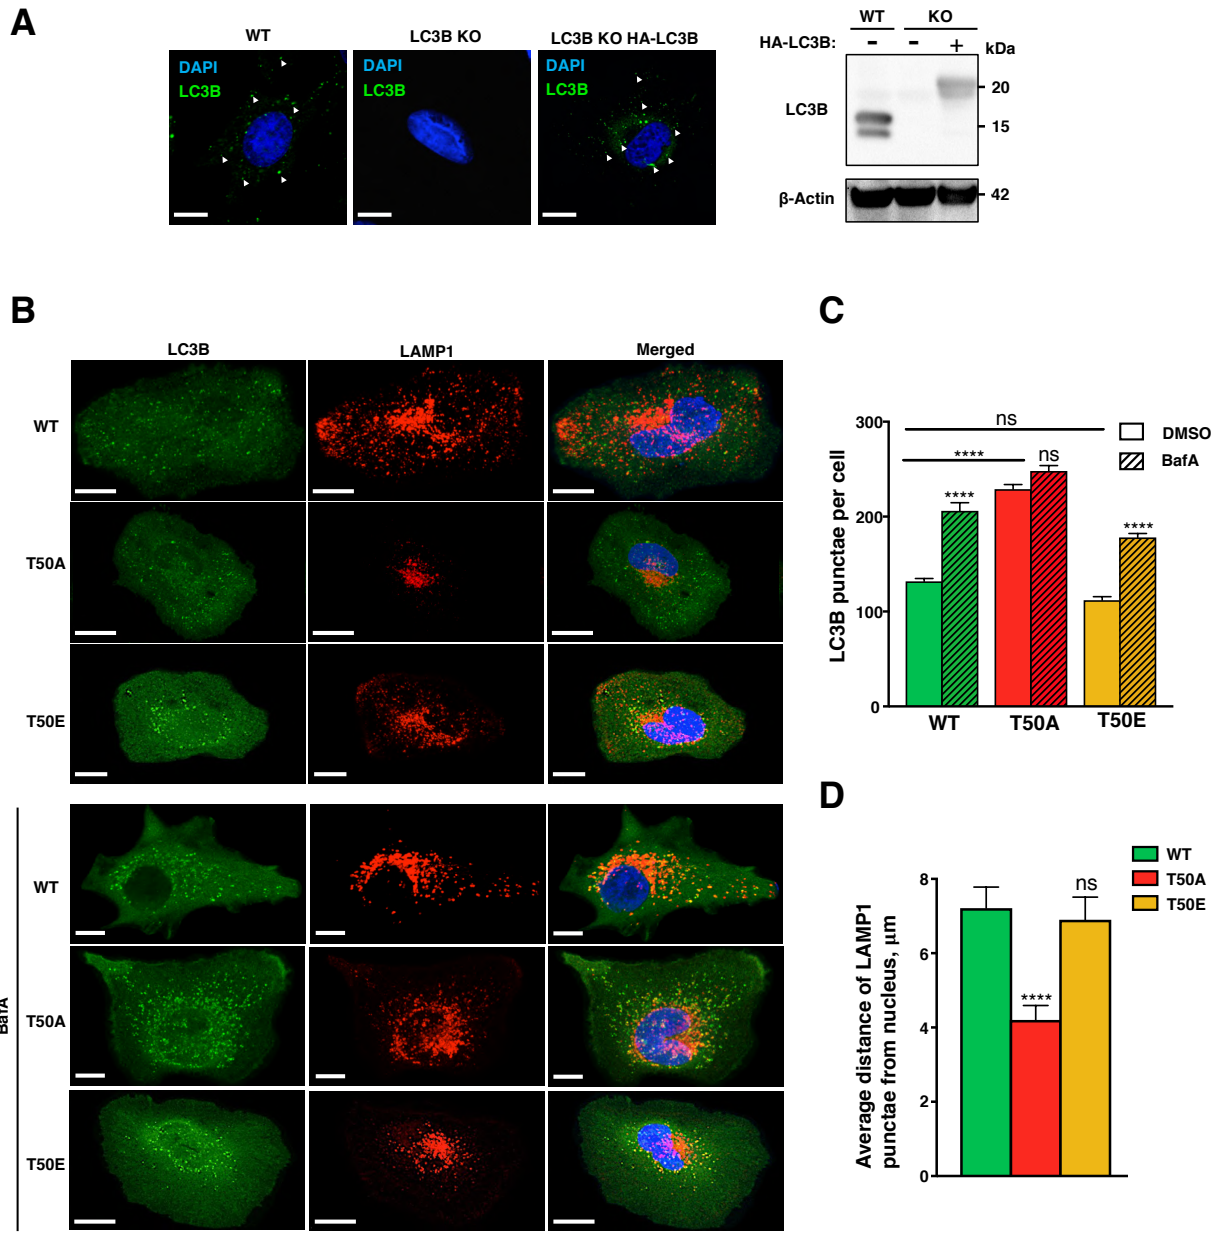

799

800

# FIGURE S2

**A**

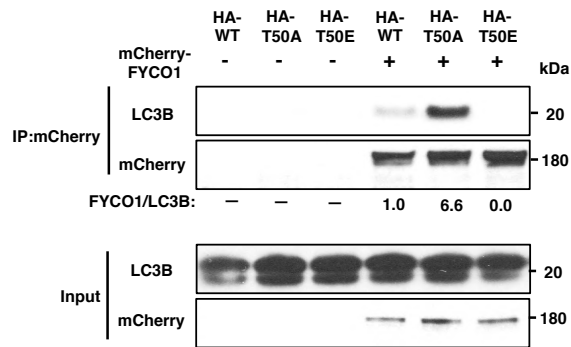

**B**

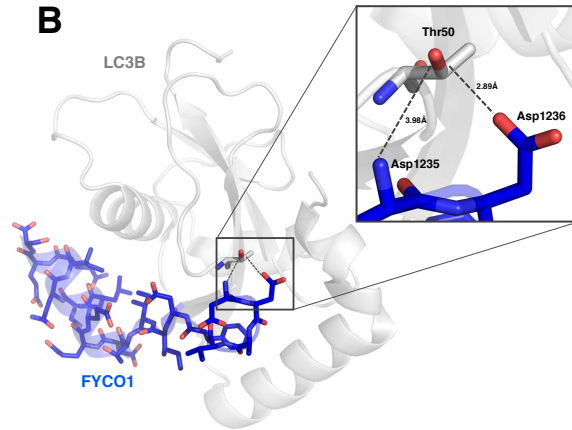

**C**

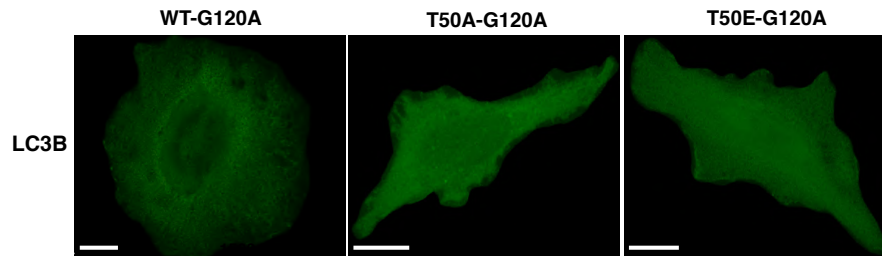

**D**

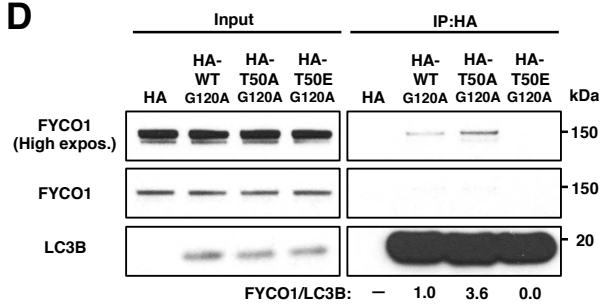

**E**

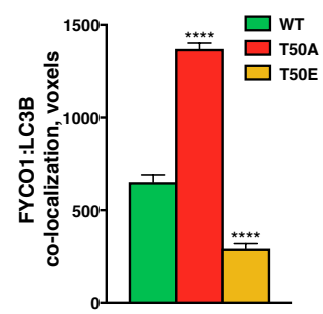

**F**

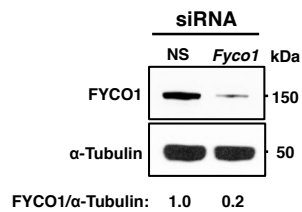

801

802

# FIGURE S3

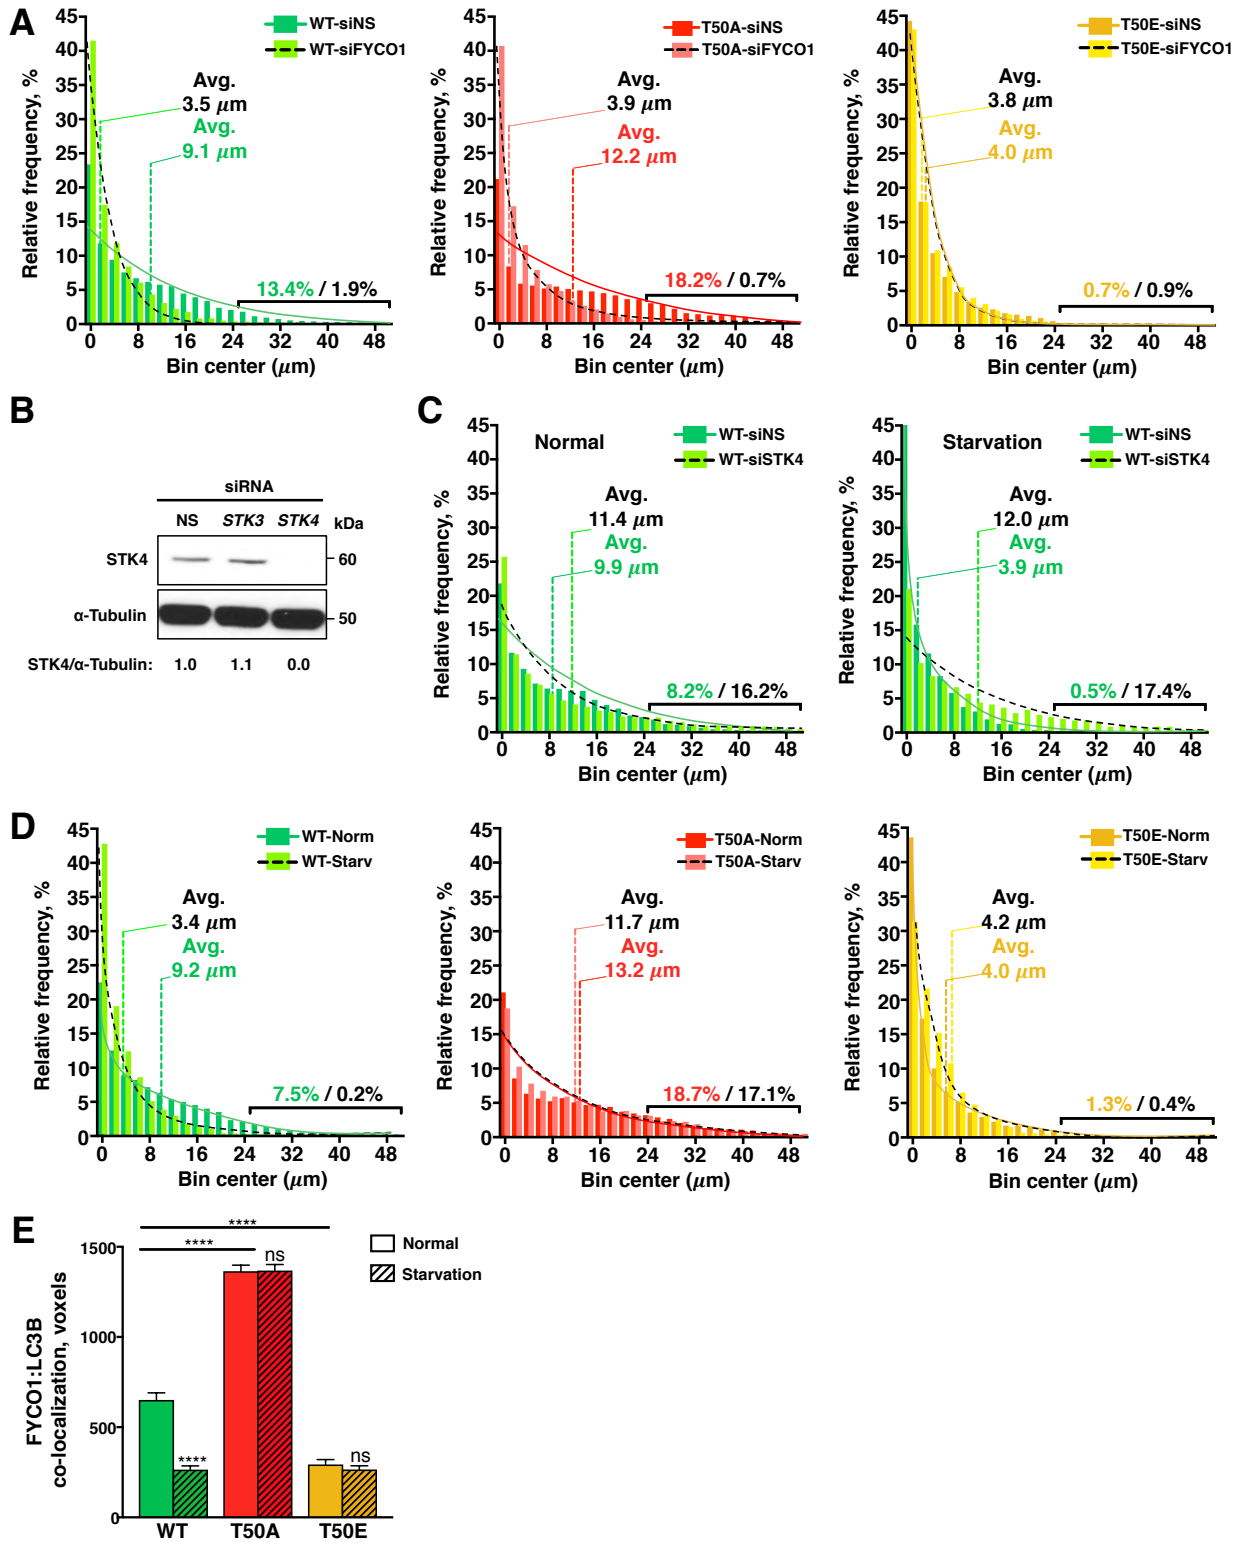

803

804

**FIGURE S4**

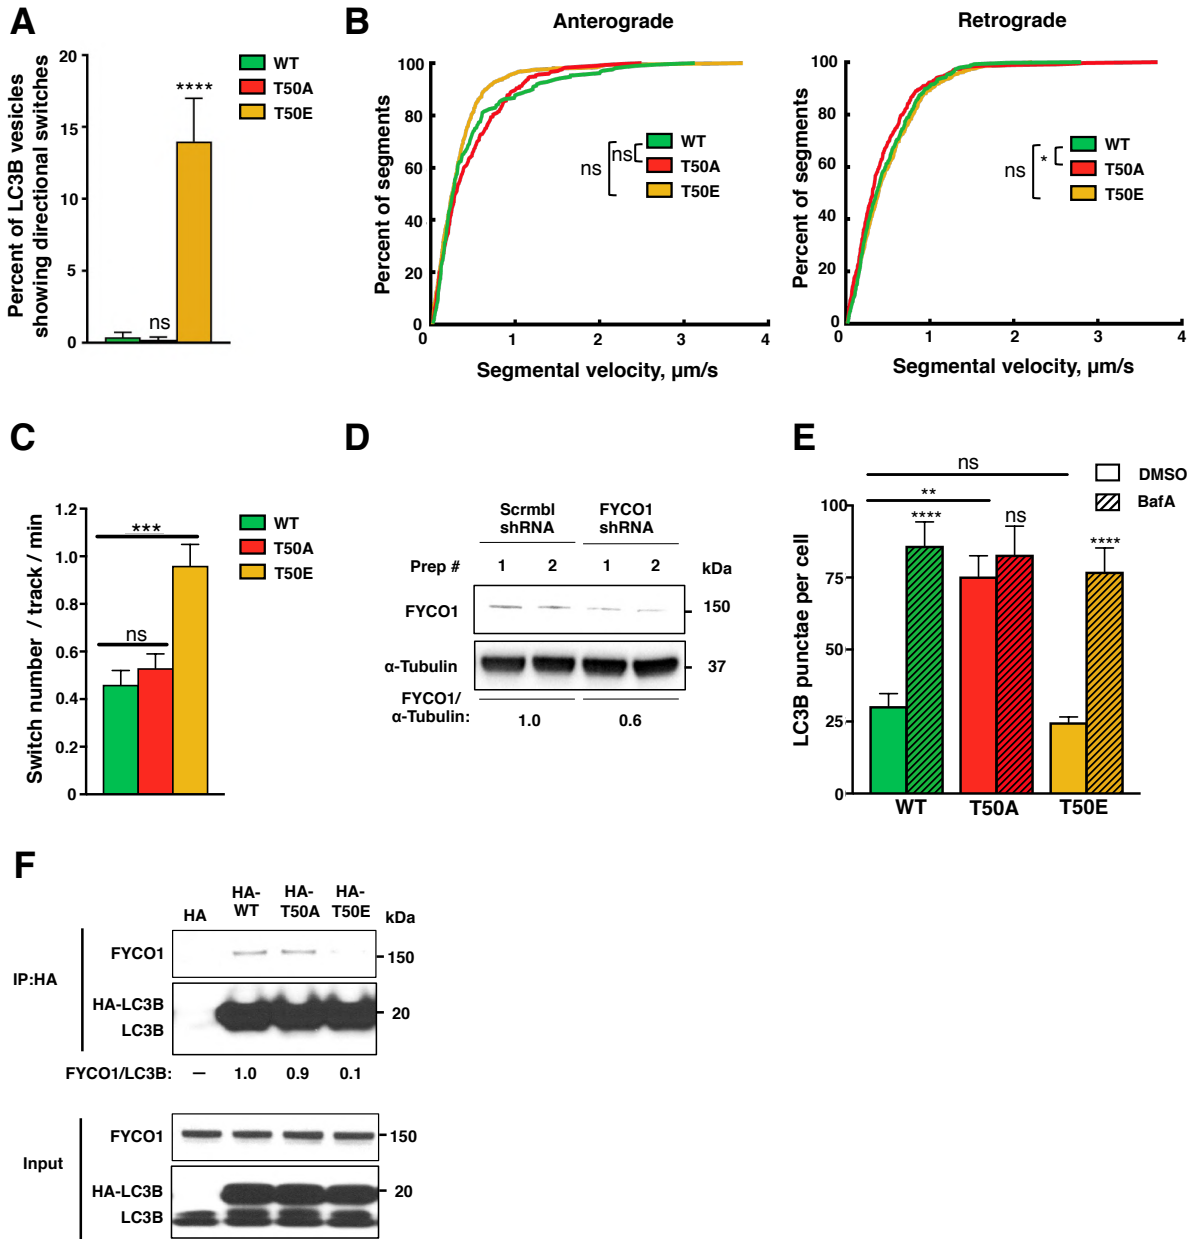

805

806

807  
808  
809

**Table S1. Oligonucleotides Used in This Study, Related to Methods**

| <b>Name</b>                  | <b>Sequence (5'- 3')</b>                    |
|------------------------------|---------------------------------------------|
| pHA-LC3B FW                  | GCTACCGGTCGCCACCATGTAC                      |
| pHA-LC3B RS                  | CAGGGGGAGGTGTGGGAGG                         |
| mCherry-FYCO1<br>Insert FW   | GCTAGCGCTACCGGTCGCCACCATGGTGAGCAAGGGCGAGGA  |
| mCherry-FYCO1<br>Insert RS   | GGTACCGTCGACTGCAGAATTCCTACAGGAAATCACTTCCATC |
| pmCherry-FYCO1<br>vector FW  | GATGGAAGTGATTTCTGTAGGAATTCTGCAGTCGACGGTACC  |
| pmCherry-FYCO1<br>vector RS  | CCCTTGCTCACCATGGTGGCGACCGTA                 |
| LC3B G120A FW                | CCCAGGAGACGTTTCGCTATGAAATTGTCAGTG           |
| LC3B G120A RS                | CACTGACAATTTTCATAGCGAACGTCTCCTGGG           |
| sgRNA Human<br>LC3B Exon1 FW | CACCGTCAAGCAGCGCCGCACCTT                    |
| sgRNA Human<br>LC3B Exon1 RS | AAACAAGGTGCGGCGCTGCTTGAC                    |
| sgRNA Human<br>LC3B Exon4 FW | CACCGTGCTTCCCAGTACTTGCAT                    |
| sgRNA Human<br>LC3B Exon4 RS | AAACATGCAAGTACTGGGAAGCAC                    |
| Check del Human<br>LC3B FW   | CCACGCTGCGTGCCG                             |
| Check del Human<br>LC3B RS   | CCAATCAGTAGAGGGCCAGATGC                     |
| Check del Human<br>LC3B 2 FW | CCTGTTGGTGAACGGACACAGC                      |
| Check del Human<br>LC3B 2 RS | CCCTGCGTTTGTGCCAACTG                        |

810  
811

812
